# Supplementary material for: Design, Synthesis, and Anticancer Activity of Novel 3,6-Diunsaturated 2,5-Diketopiperazines
Source: MDPI journal article supplement (doi:10.3390/md21060325), 2023-05-26
Supplement: s1 [file s1]

## Copies of NMR spectra for the derivatives

Note: **3** and **7** are known compounds<sup>1-2</sup>

Figure S1. <sup>1</sup>H NMR of **1**.

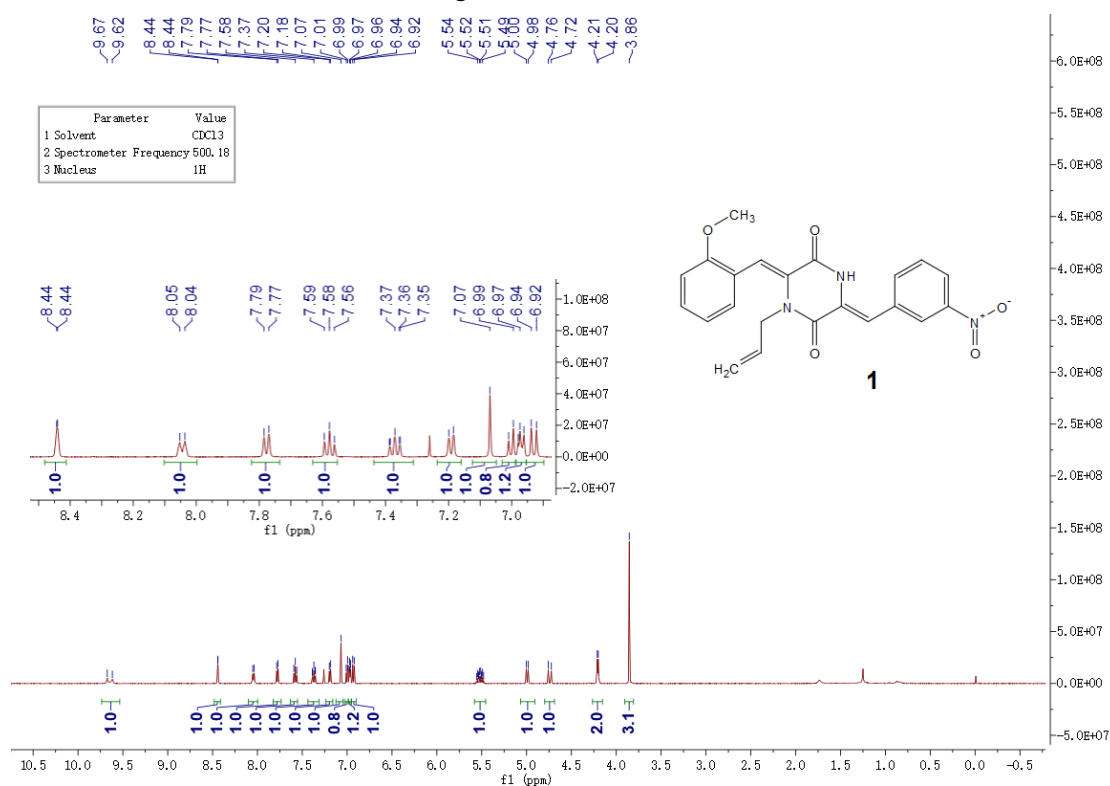

Figure S2. <sup>13</sup>C NMR of **1**.

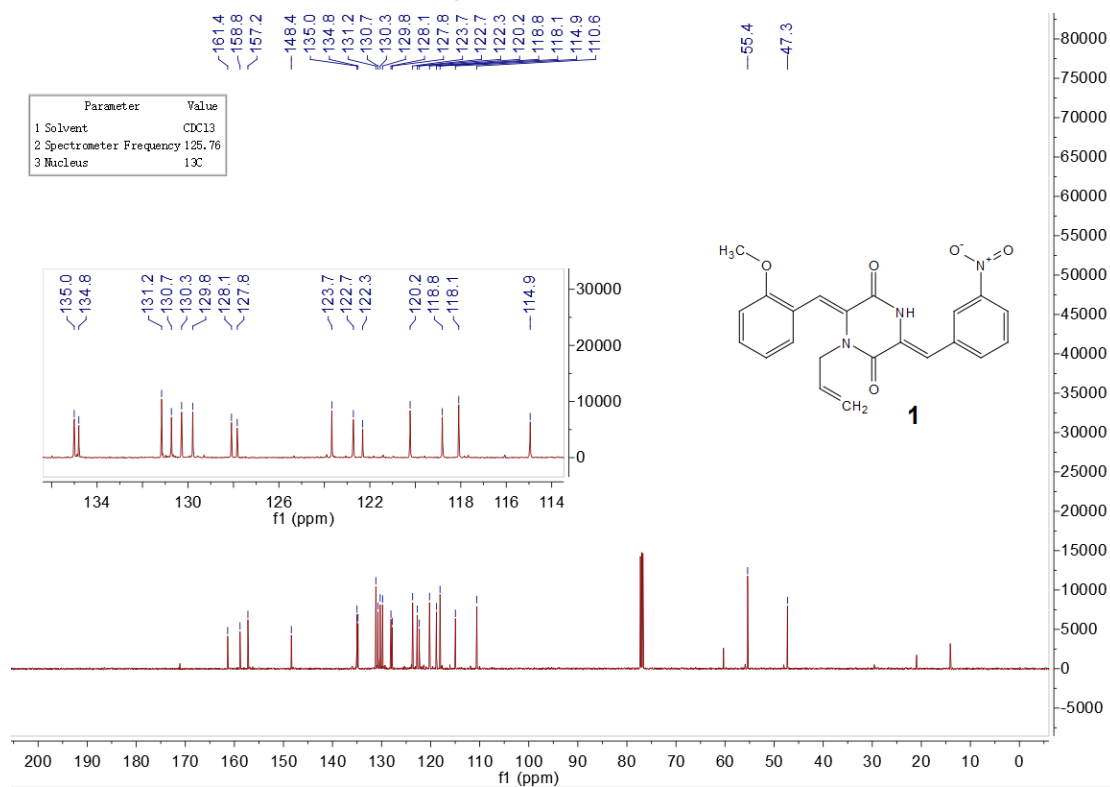

Figure S3.  $^1\text{H}$  NMR of **2**.

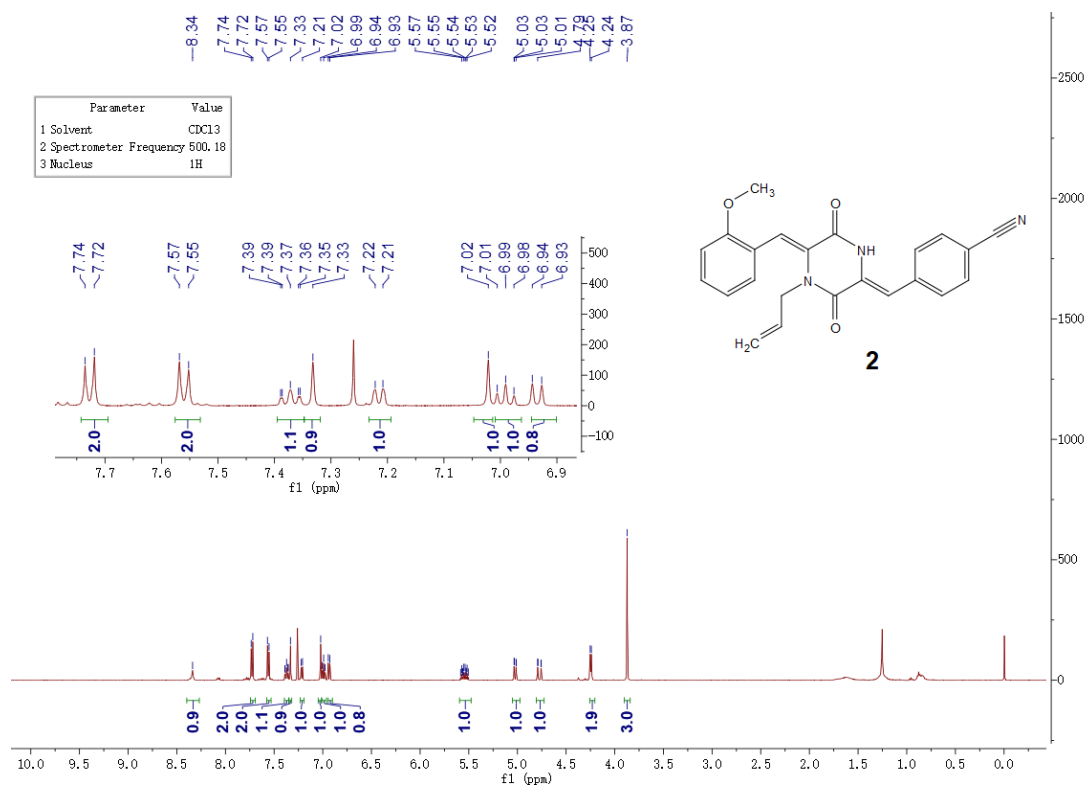

Figure S4.  $^{13}\text{C}$  NMR of **2**.

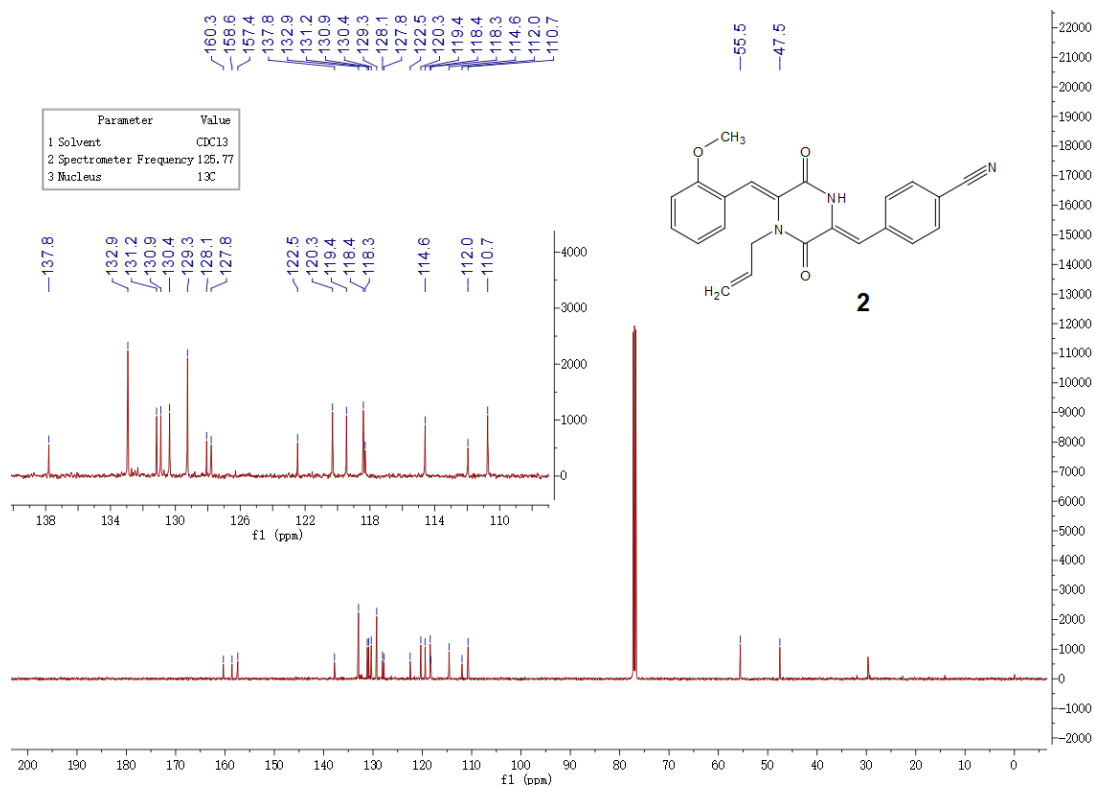

Figure S5.  $^1\text{H}$  NMR of **4**.

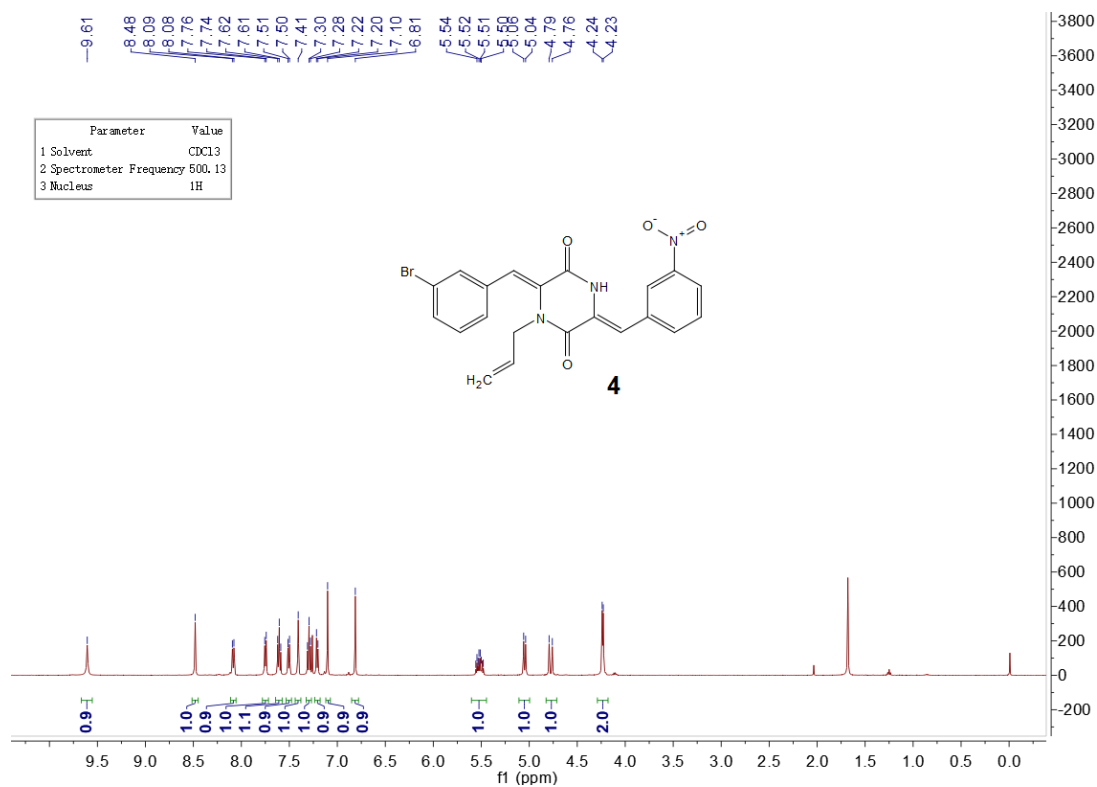

Figure S6.  $^{13}\text{C}$  NMR of **4**.

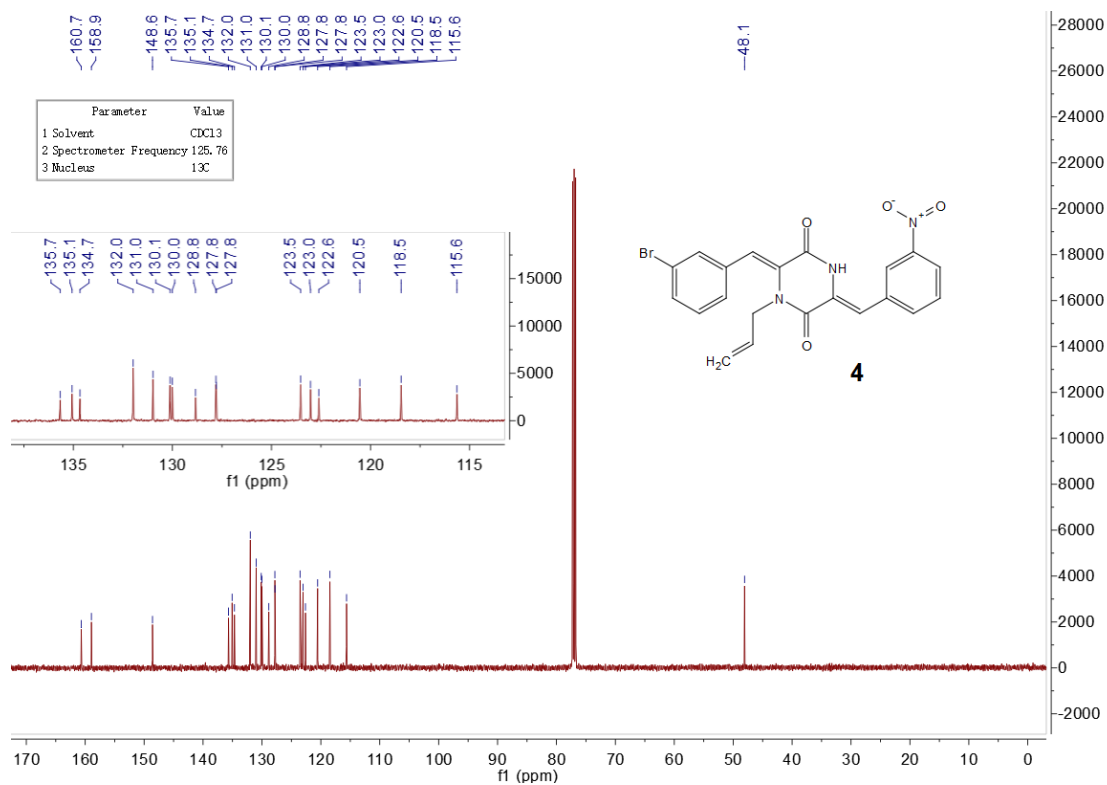

Figure S7.  $^1\text{H}$  NMR of **5**.

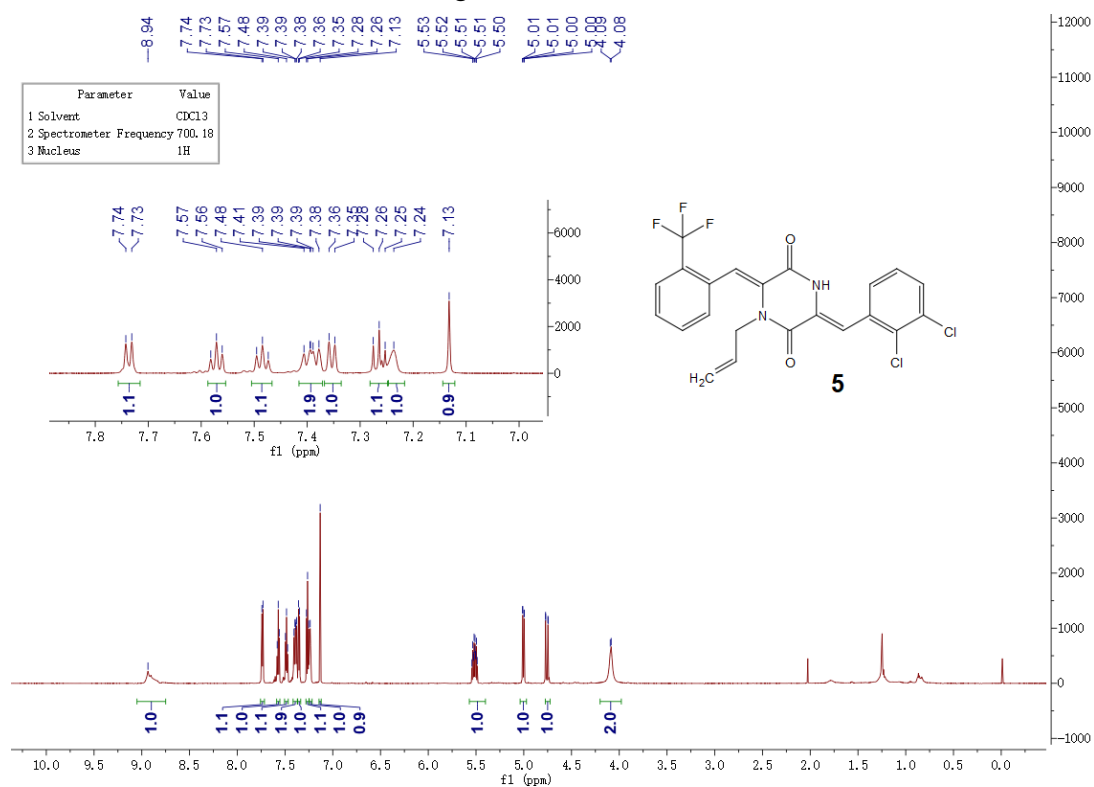

Figure S8.  $^{13}\text{C}$  NMR of **5**.

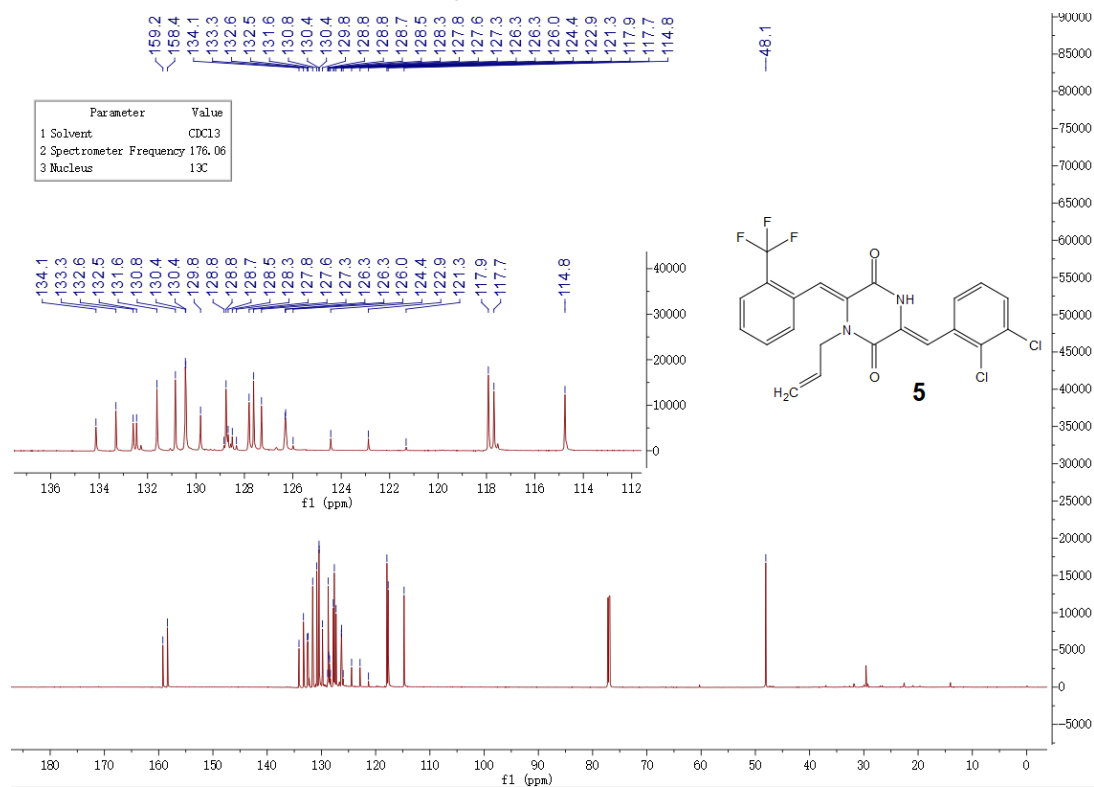

Figure S9.  $^1\text{H}$  NMR of **6**.

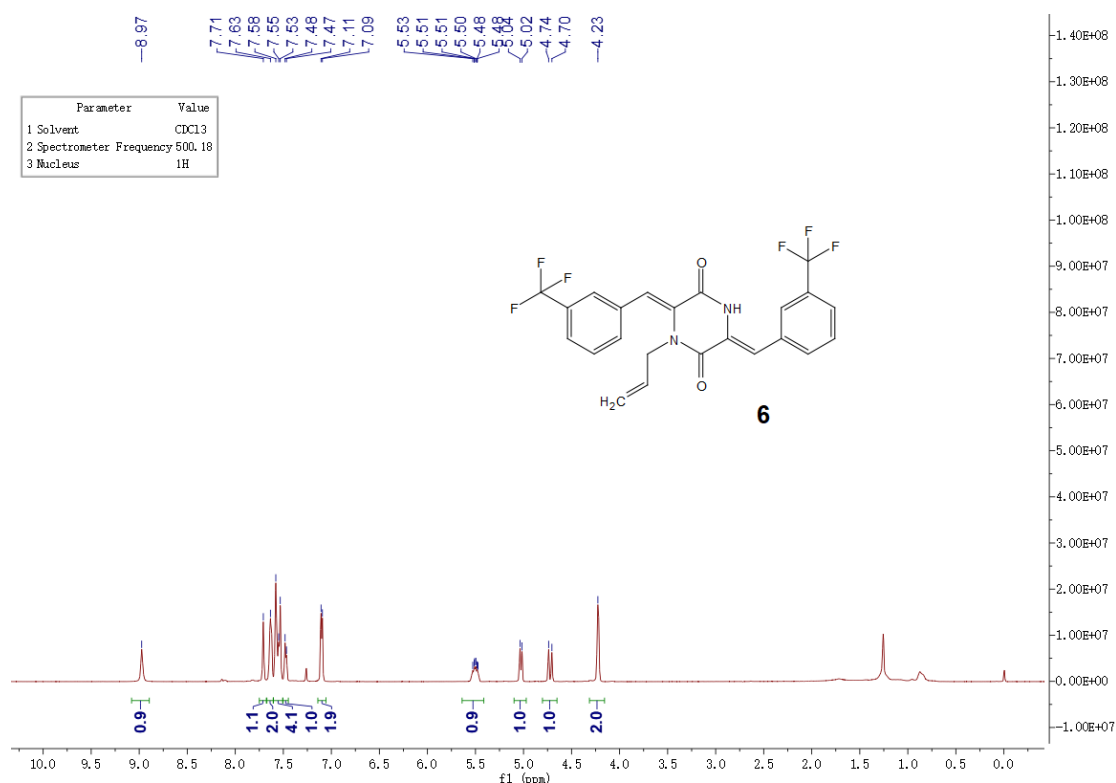

Figure S10.  $^{13}\text{C}$  NMR of **6**.

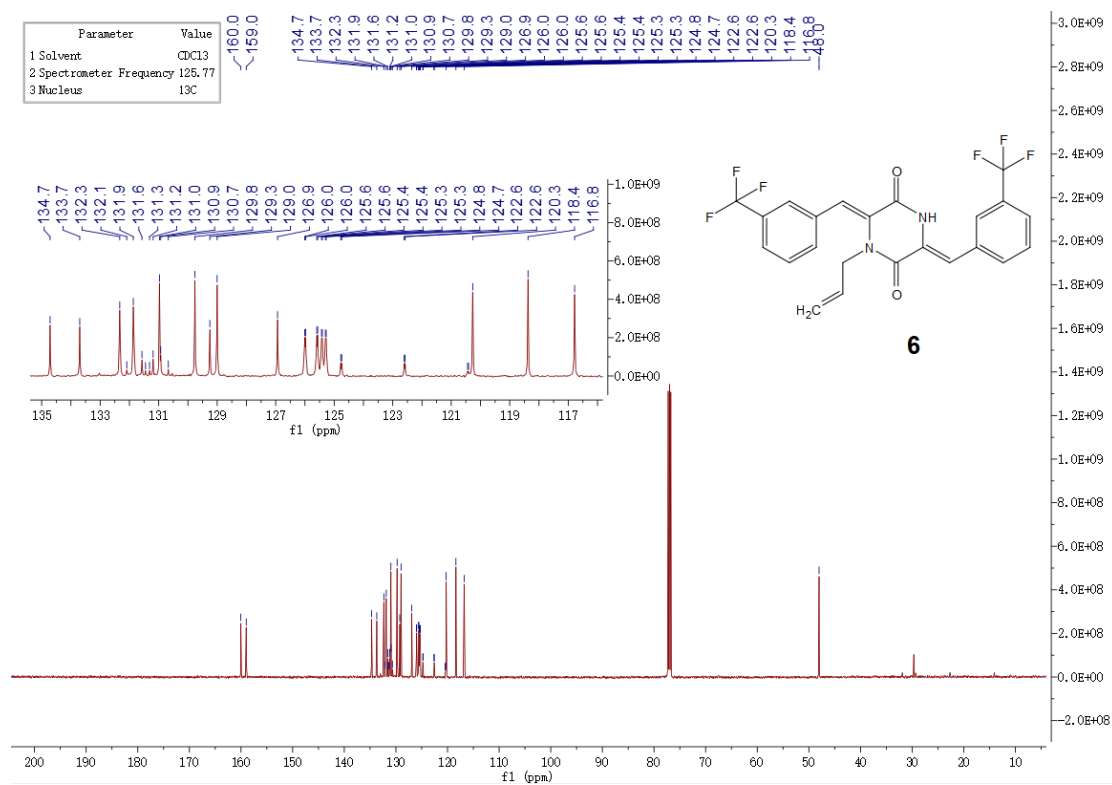

Figure S11.  $^1\text{H}$  NMR of **8**.

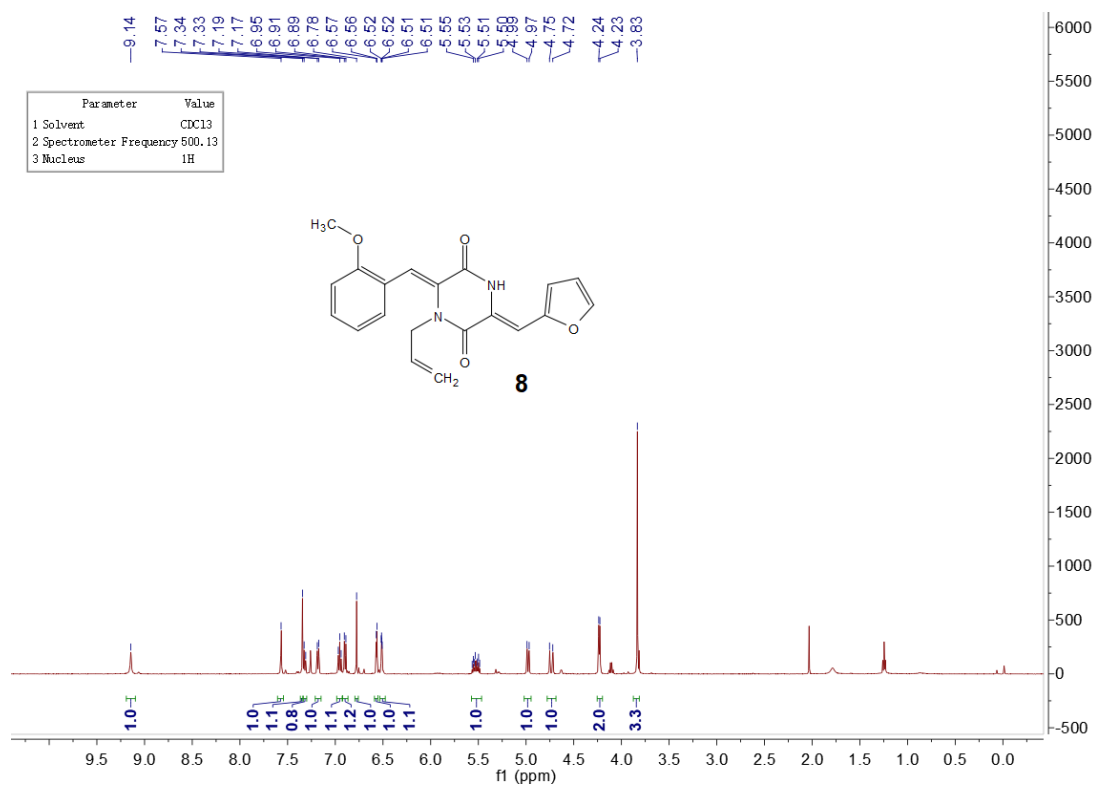

Figure S12.  $^{13}\text{C}$  NMR of **8**.

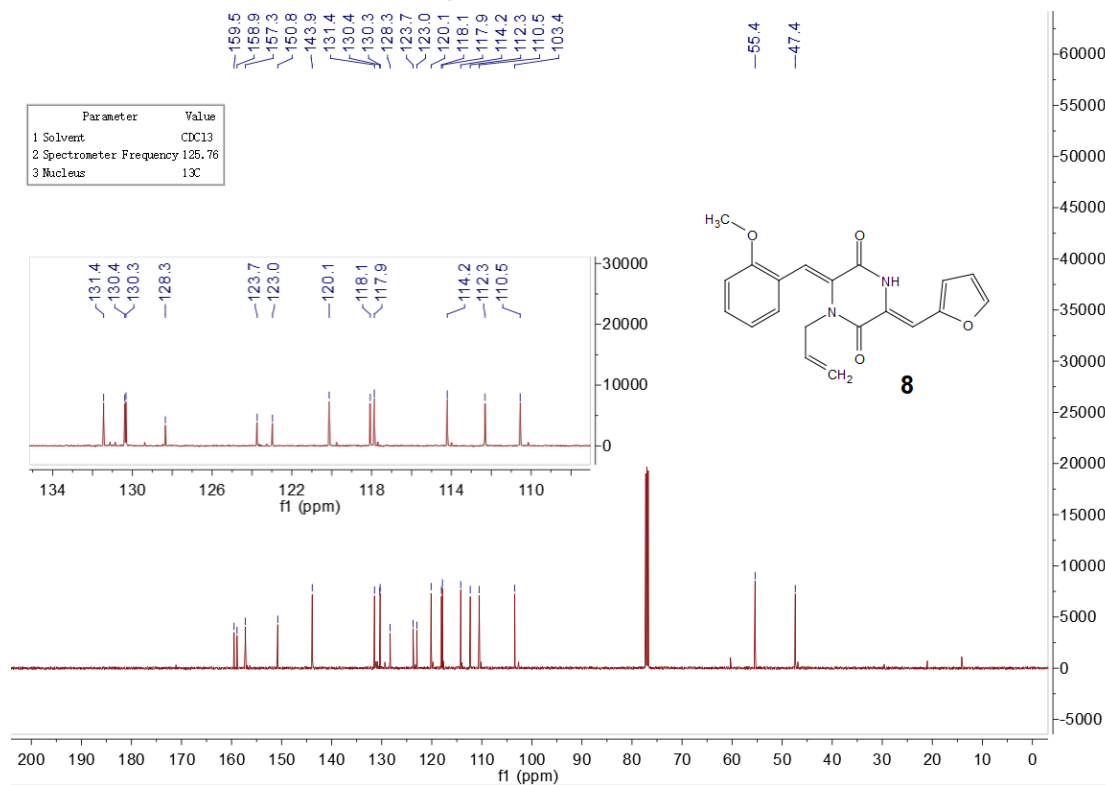

Figure S13.  $^1\text{H}$  NMR of **9**.

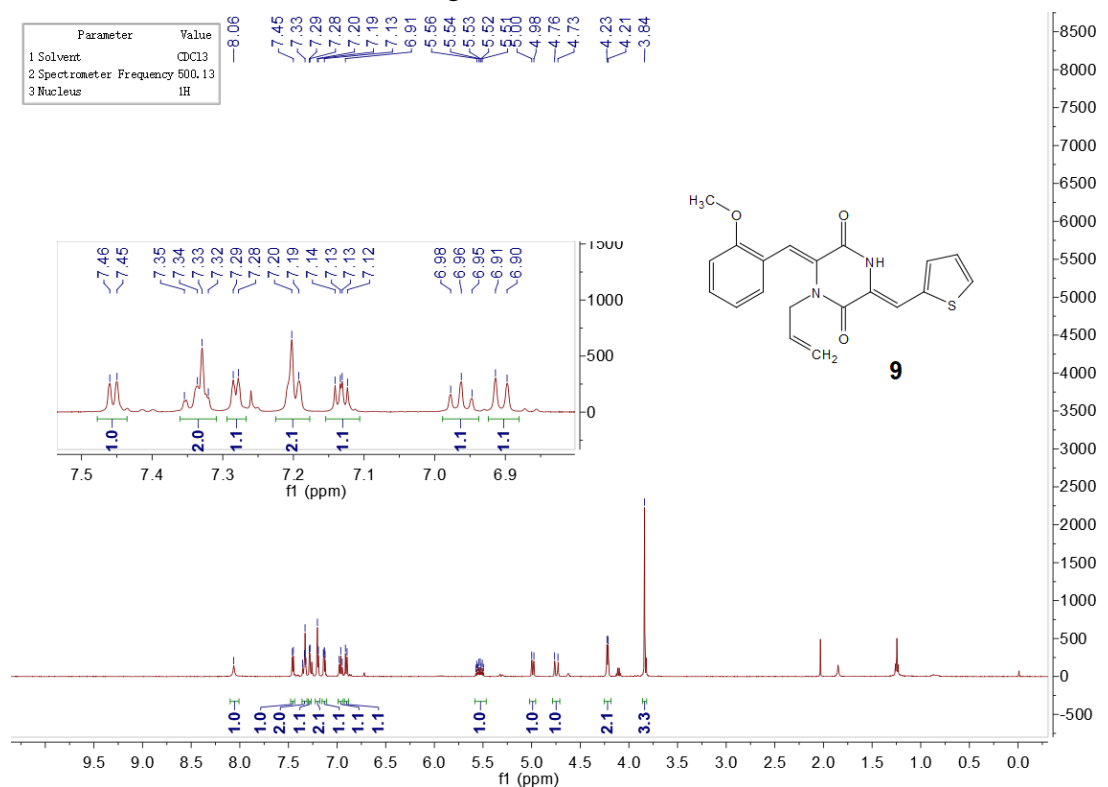

Figure S14.  $^{13}\text{C}$  NMR of **9**.

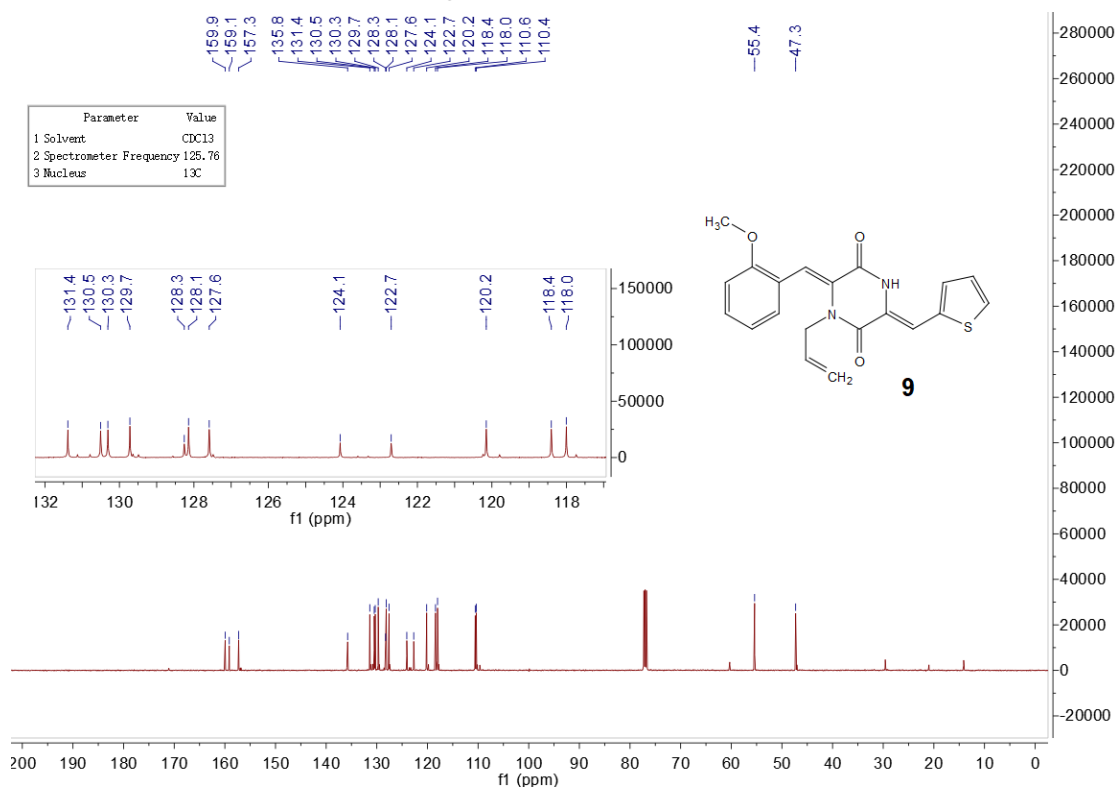

Chemical structure of compound **10** is shown above the spectrum. The structure is a pyrimidine derivative with a 4-methoxyphenyl group, a 2-pyridylmethyl group, and a 2-vinyl group.

COc1ccc(cc1)/C=C2C(=O)NC(=O)N2/C=C/c3ccncc3

The <sup>1</sup>H NMR spectrum (CDCl<sub>3</sub>, 500 MHz) shows the following peaks (ppm) and integrations:

| Chemical Shift (ppm) | Integration |
|----------------------|-------------|
| 12.66                | 1.0         |
| 8.63                 | 0.9         |
| 7.38                 | 1.0         |
| 7.34                 | 0.9         |
| 7.33                 | 1.9         |
| 7.20                 | 1.9         |
| 7.18                 | 1.0         |
| 6.96                 | 1.0         |
| 6.91                 | 1.0         |
| 6.89                 | 0.9         |
| 6.57                 | 0.9         |
| 5.56                 | 0.9         |
| 5.55                 | 0.9         |
| 5.53                 | 0.9         |
| 5.52                 | 1.1         |
| 5.51                 | 2.0         |
| 5.00                 | 3.1         |
| 4.98                 | 3.1         |
| 4.77                 | 3.1         |
| 4.74                 | 3.1         |
| 4.27                 | 3.1         |
| 4.26                 | 3.1         |
| 3.84                 | 3.1         |

COc1ccccc1C=C2C(=O)NC(=O)N2C=Cc3cccnc3
  
**10**

| Parameter                | Value             |
|--------------------------|-------------------|
| 1 Solvent                | CDCl <sub>3</sub> |
| 2 Spectrometer Frequency | 125.76            |
| 3 Nucleus                | <sup>13</sup> C   |

159.5  
 158.8  
 157.2  
 154.9  
 148.4  
 136.9  
 131.4  
 130.9  
 130.3  
 128.6  
 125.9  
 123.2  
 122.0  
 120.1  
 118.2  
 117.9  
 110.6  
 109.8  
 55.4  
 47.4



Figure S17.  $^1\text{H}$  NMR of **11**.

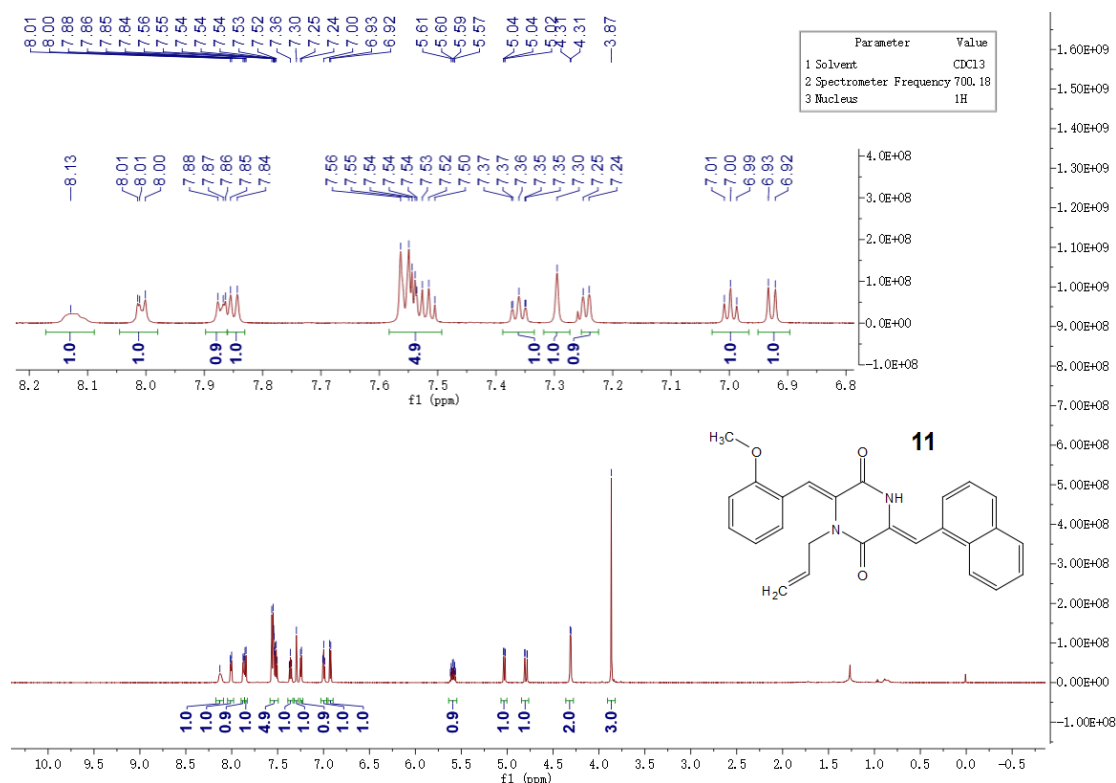

Figure S18.  $^{13}\text{C}$  NMR of **11**.

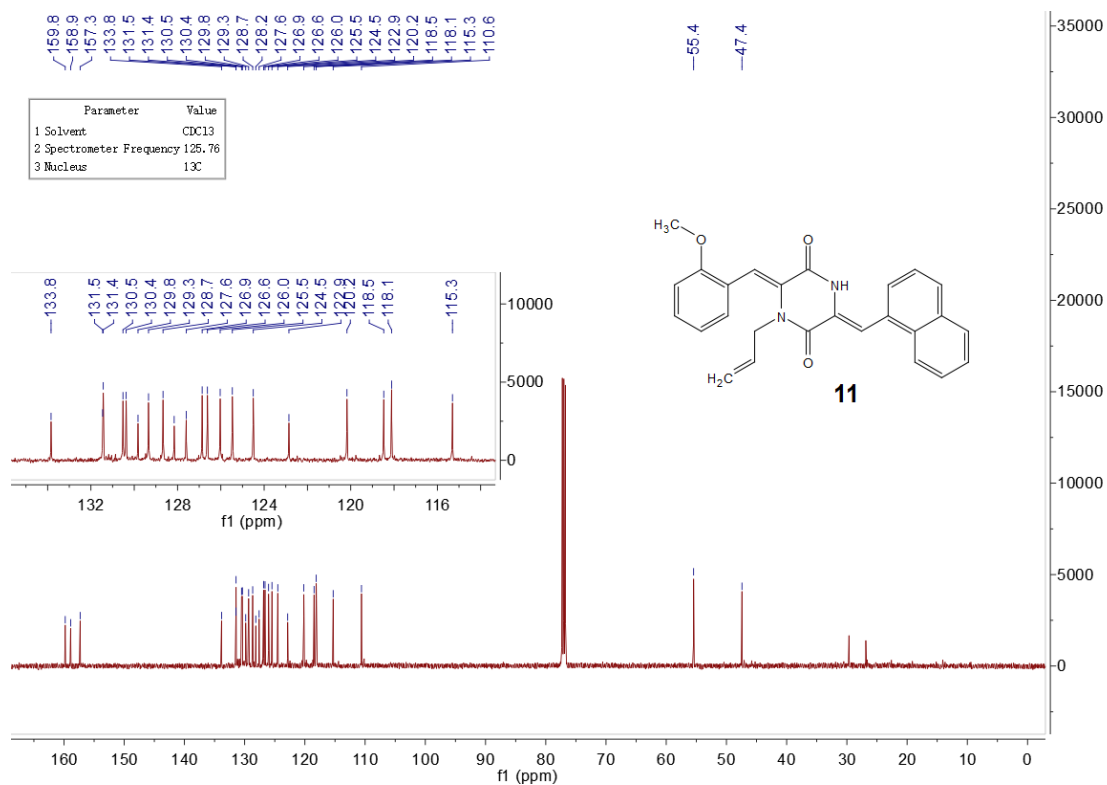

Figure S19.  $^1\text{H}$  NMR of **12**.

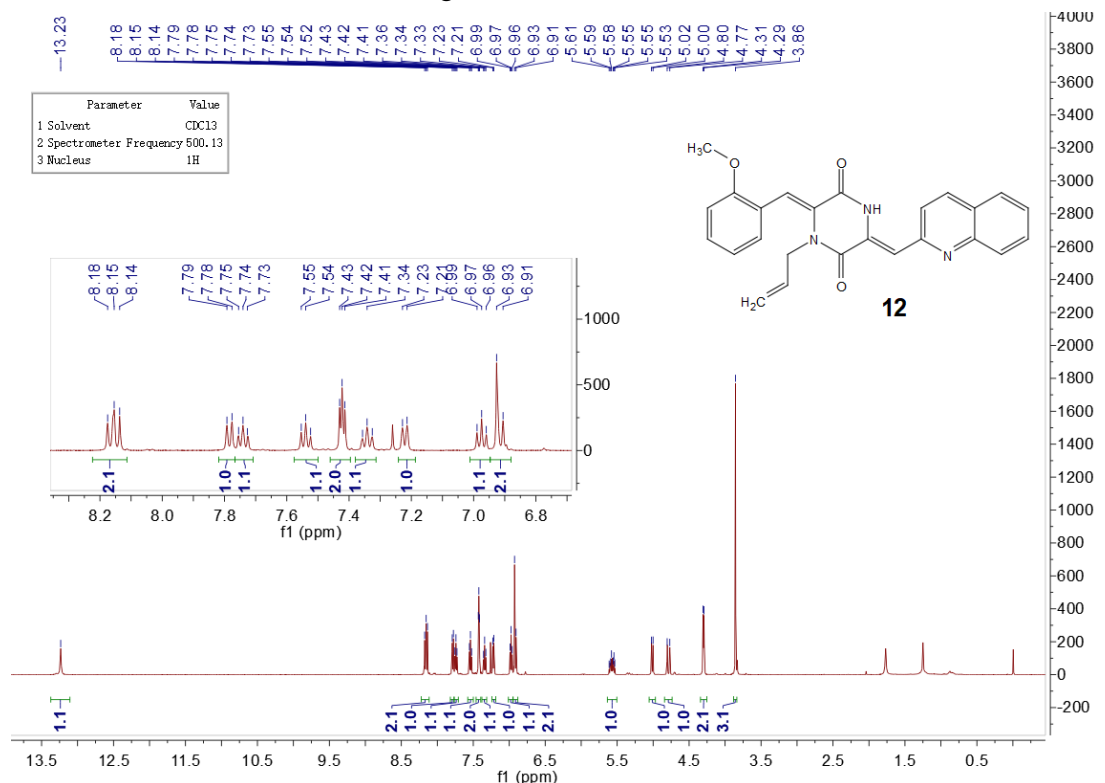

Figure S20.  $^{13}\text{C}$  NMR of **12**.

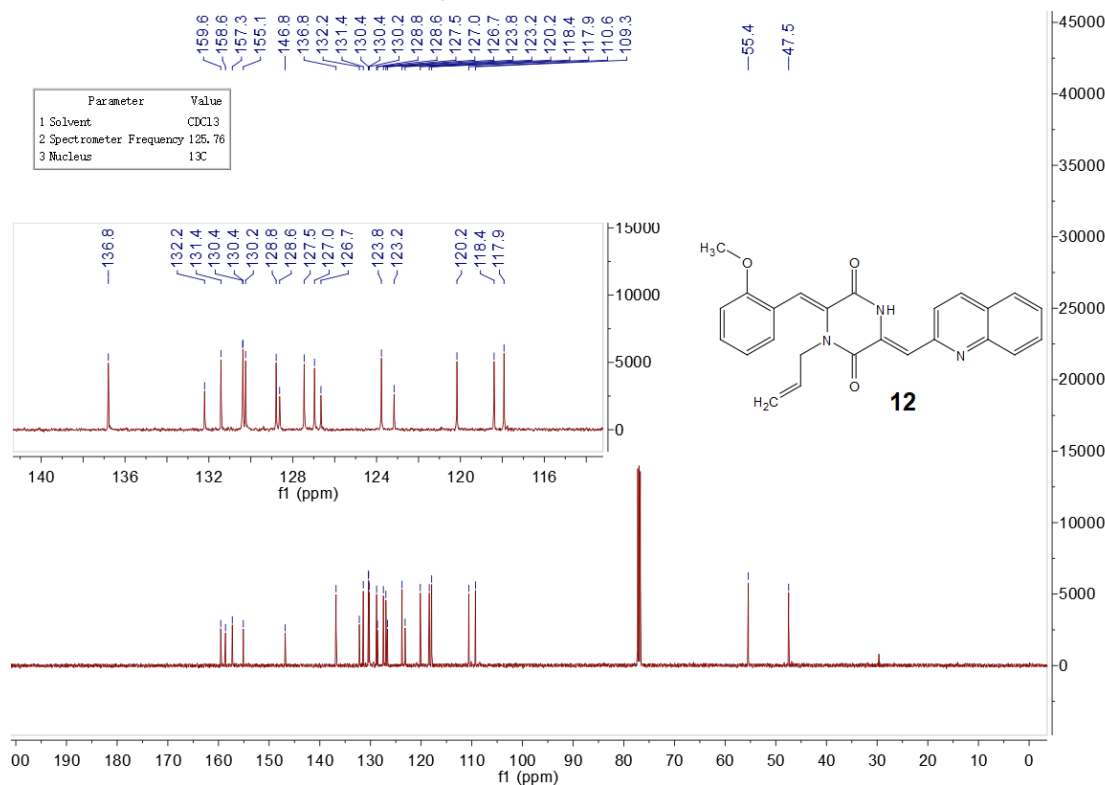

Figure S21.  $^1\text{H}$  NMR of **13**.

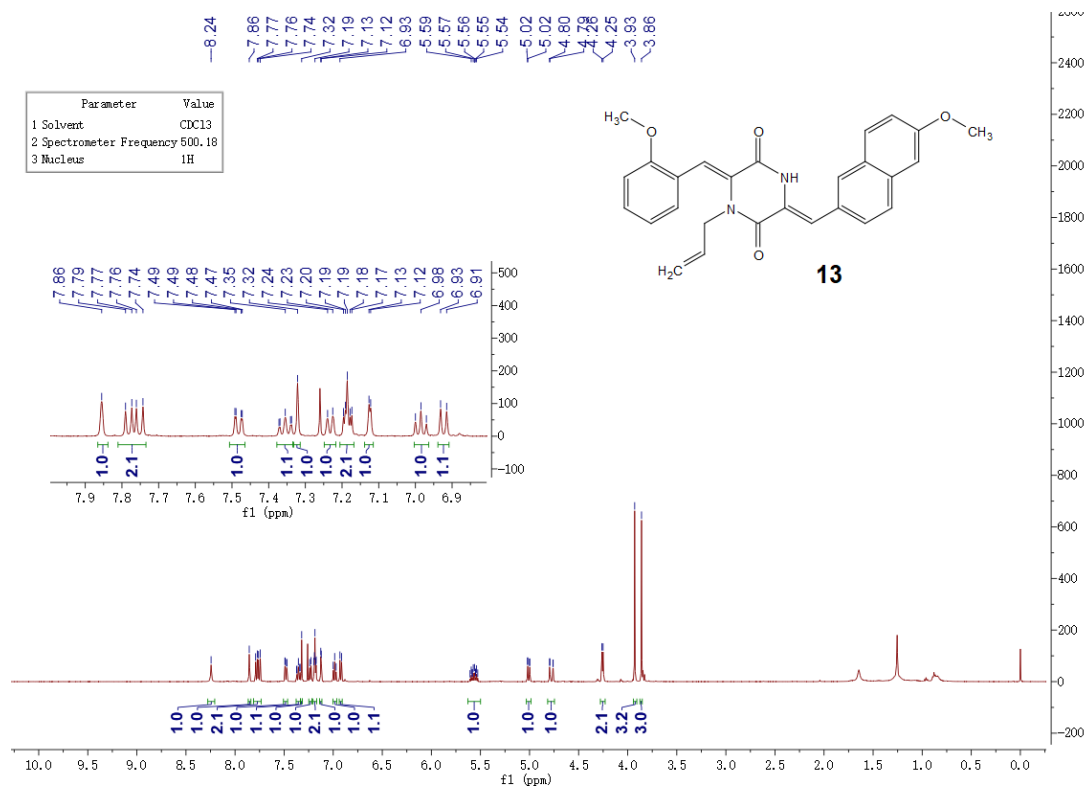

Figure S22.  $^{13}\text{C}$  NMR of **13**.

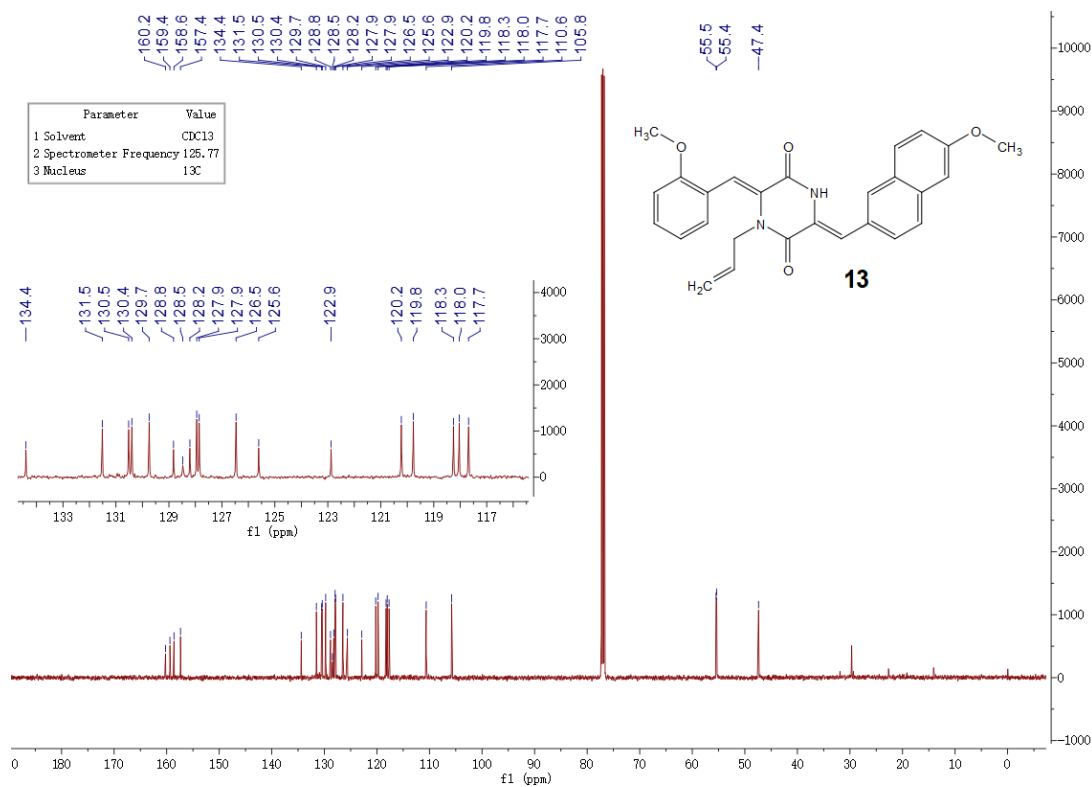

Figure S23.  $^1\text{H}$  NMR of **14**.

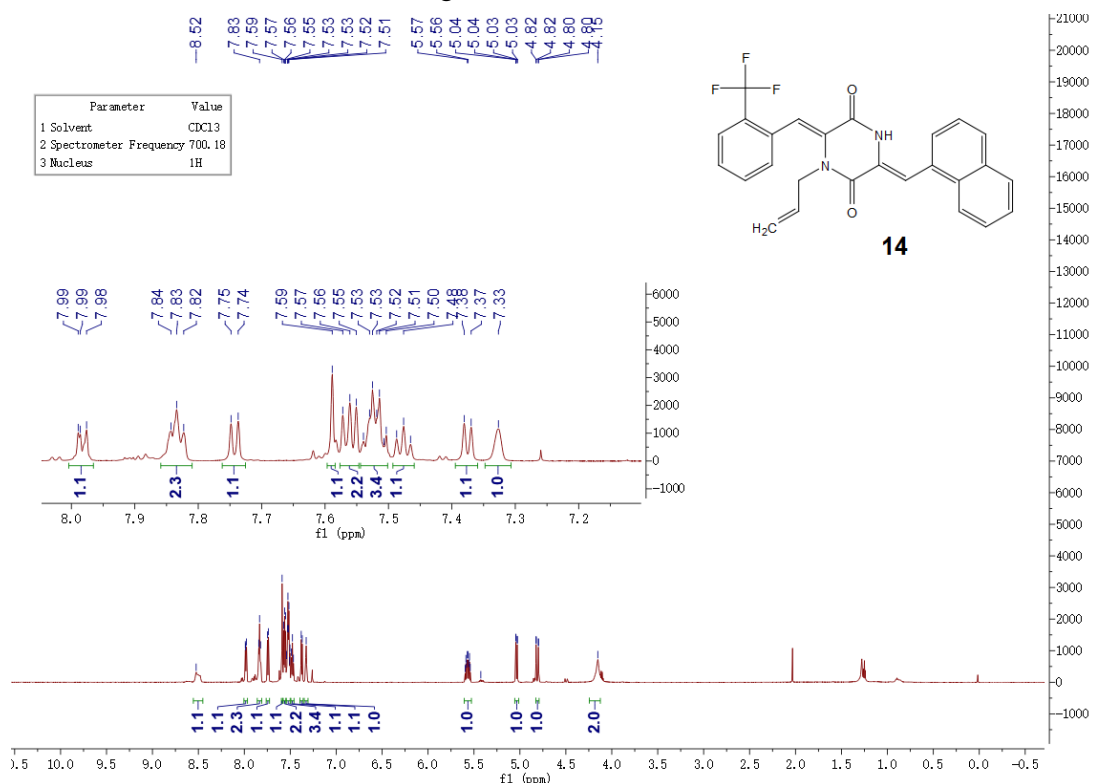

Figure S24.  $^{13}\text{C}$  NMR of **14**.

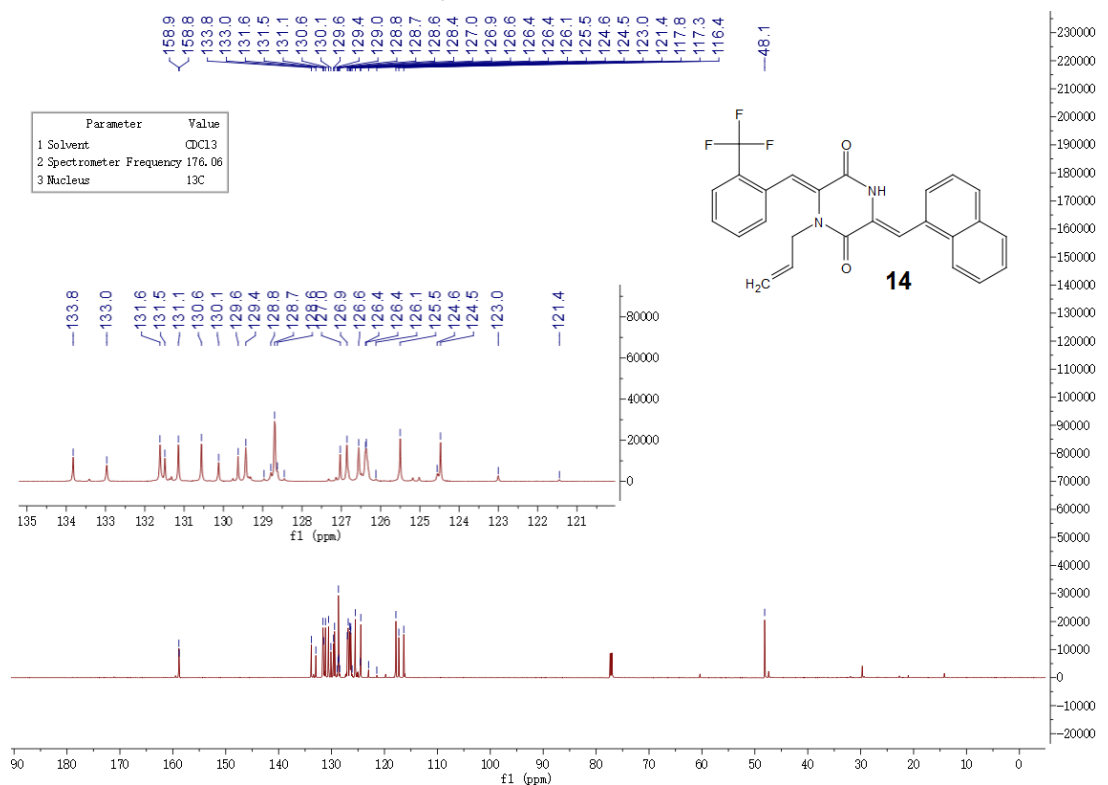

Figure S25. <sup>1</sup>H NMR of **15**.

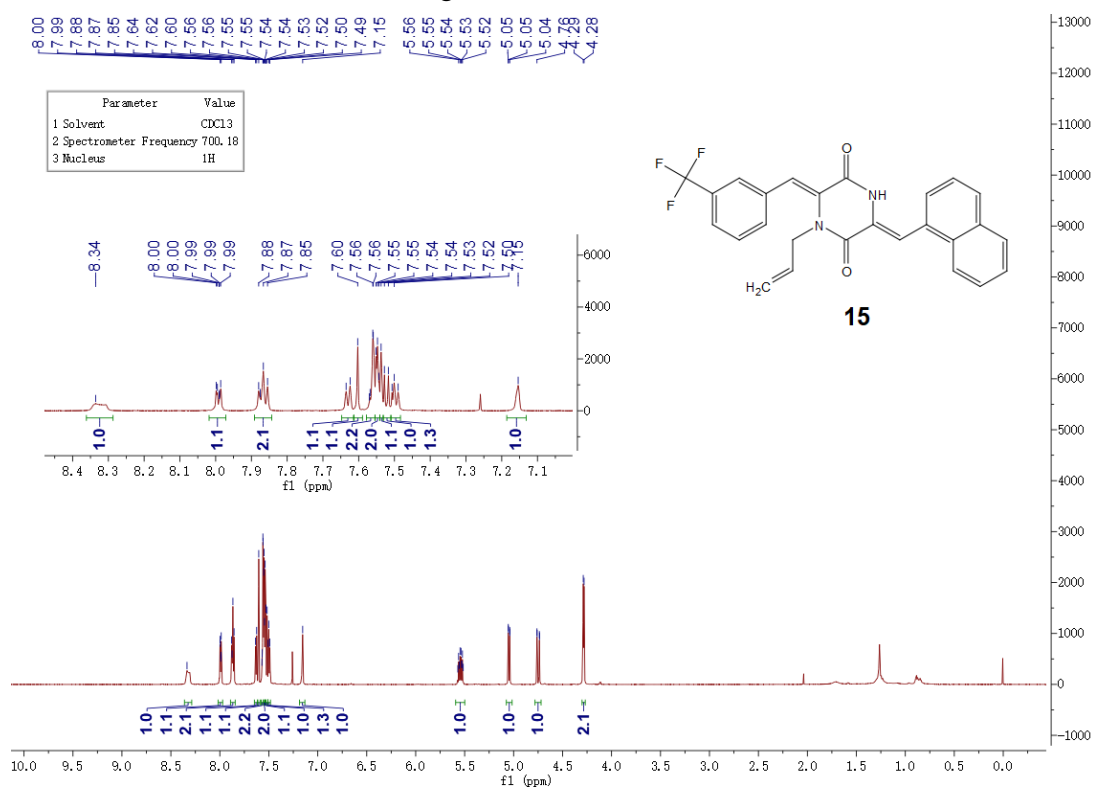

Figure S26. <sup>13</sup>C NMR of **15**.

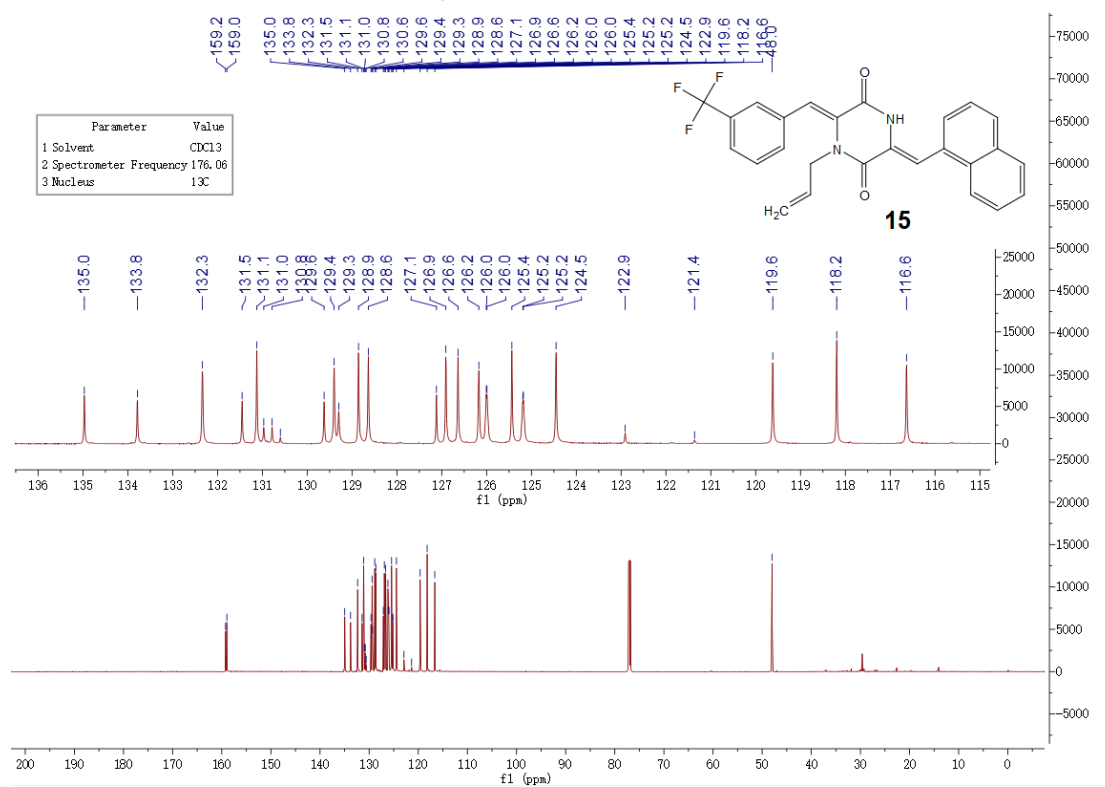

Figure S27.  $^1\text{H}$  NMR of **16**.

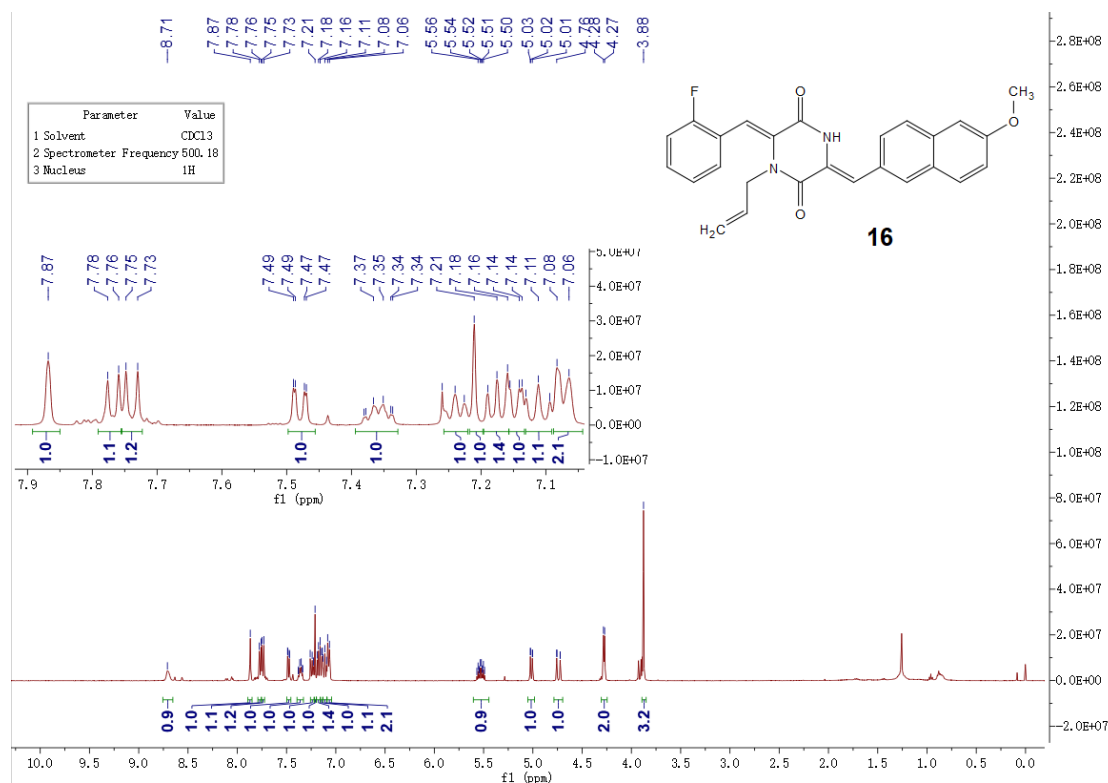

Figure S28.  $^{13}\text{C}$  NMR of **16**.

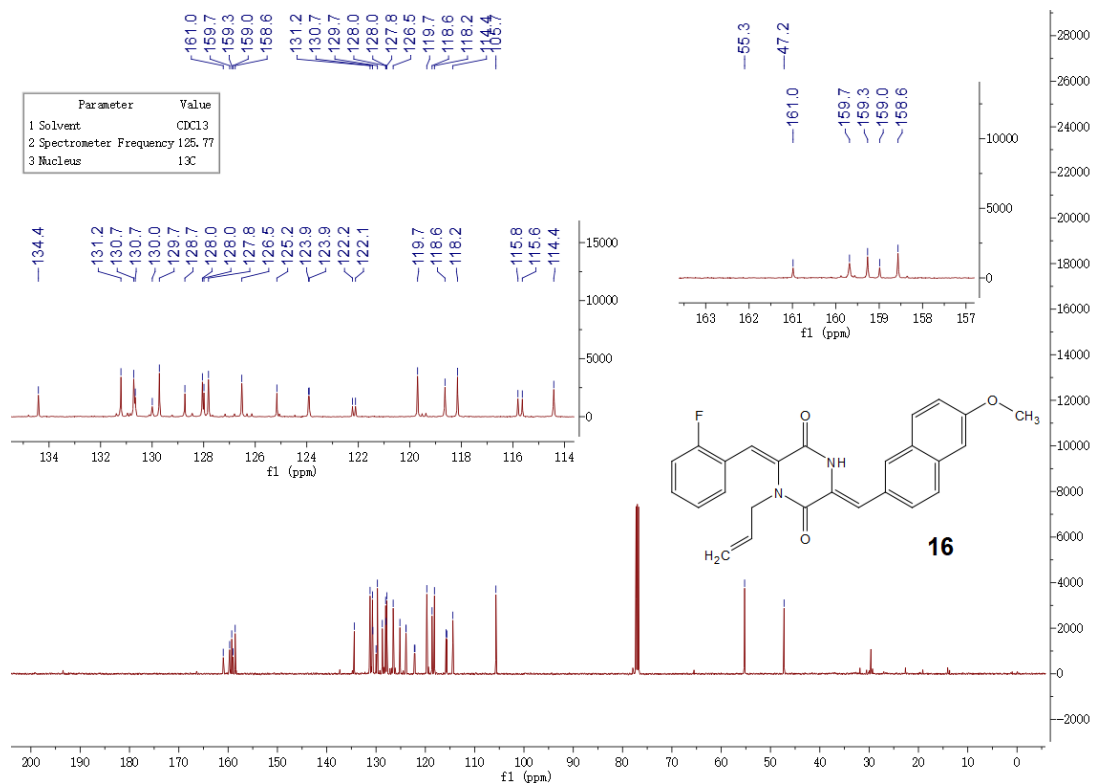

Figure S29.  $^1\text{H}$ - $^1\text{H}$  NOESY of **11**.

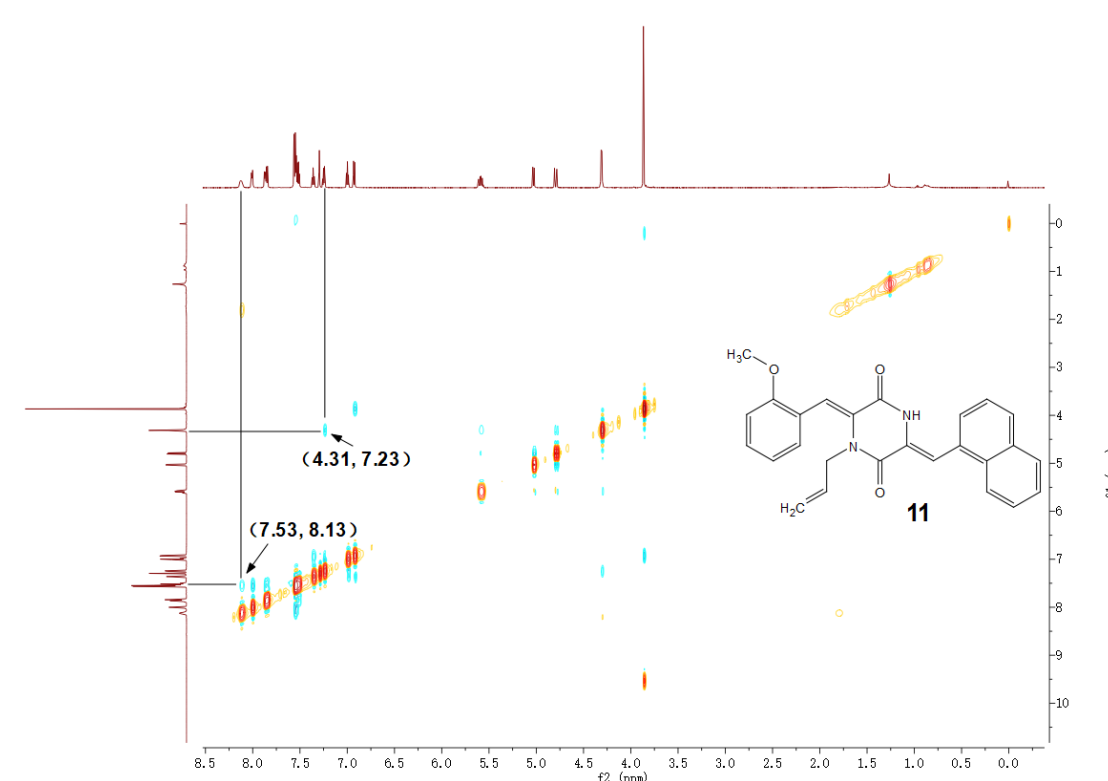

Figure S30. HPLC spectrum for compound **1**.

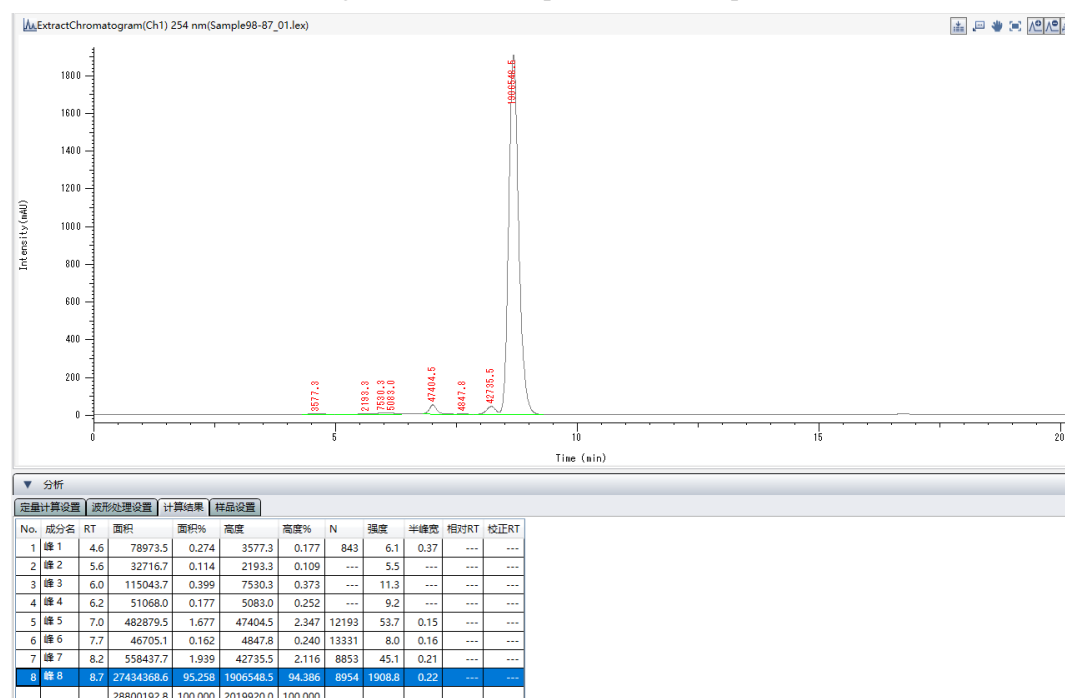

Figure S31. HPLC spectrum for compound 2.

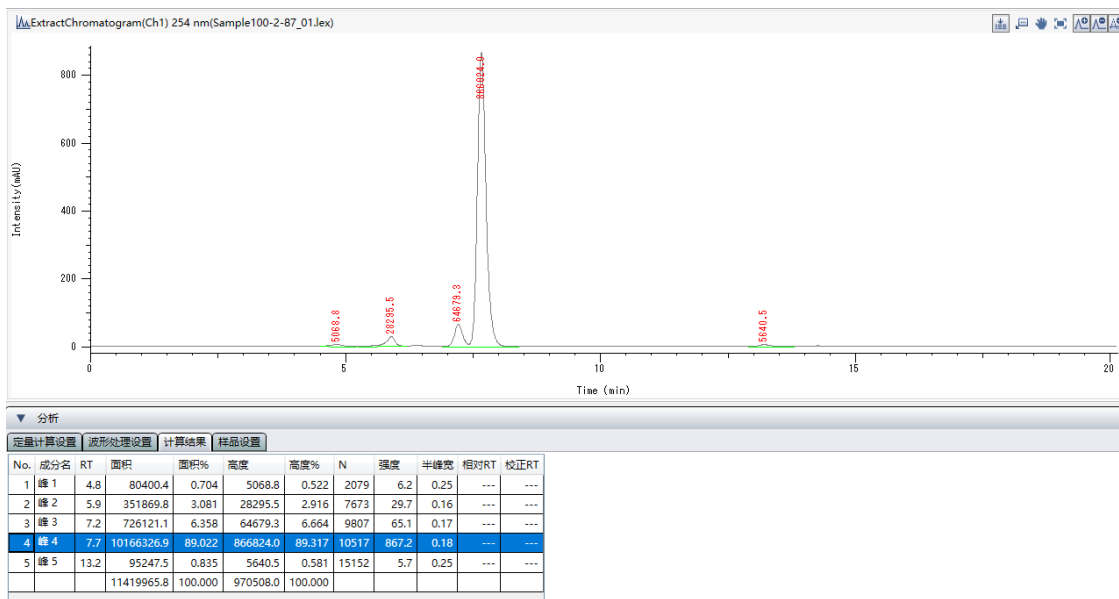

Figure S32. HPLC spectrum for compound 3.

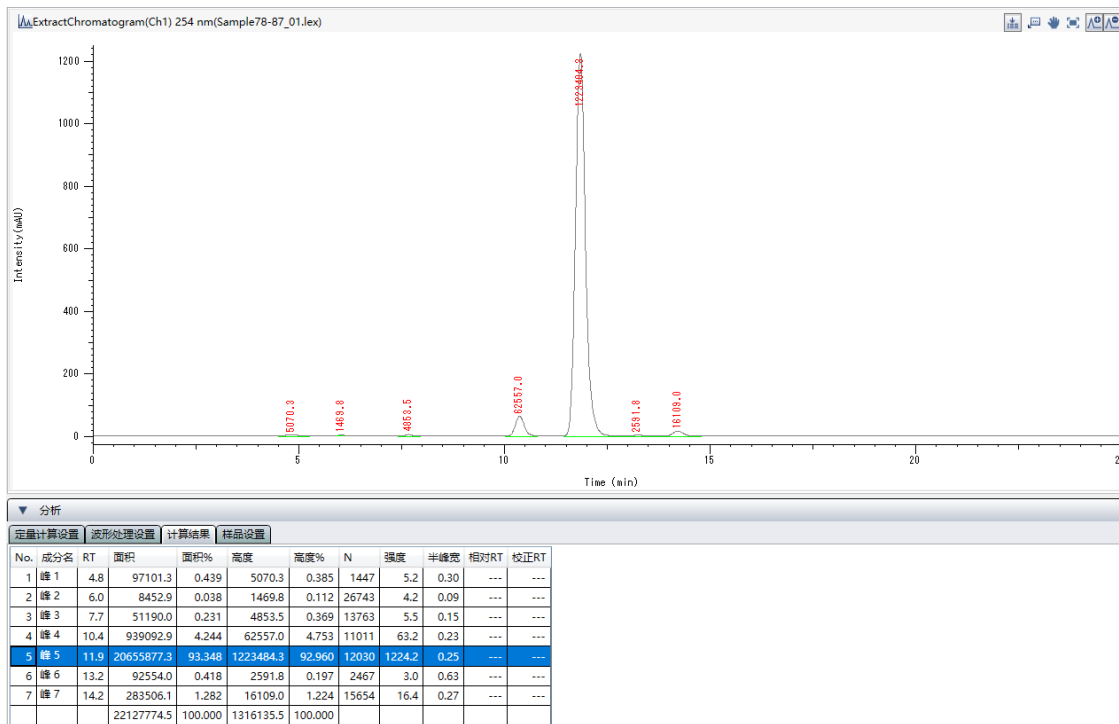



Figure S33. HPLC spectrum for compound 4.

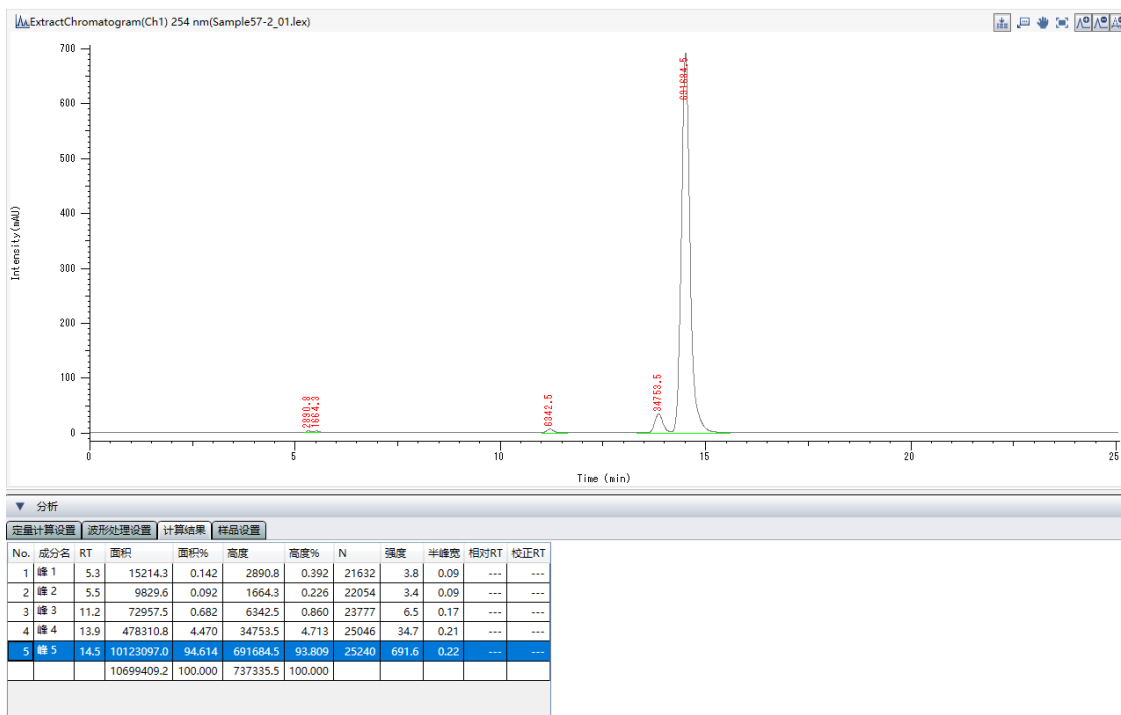

Figure S34. HPLC spectrum for compound 5.

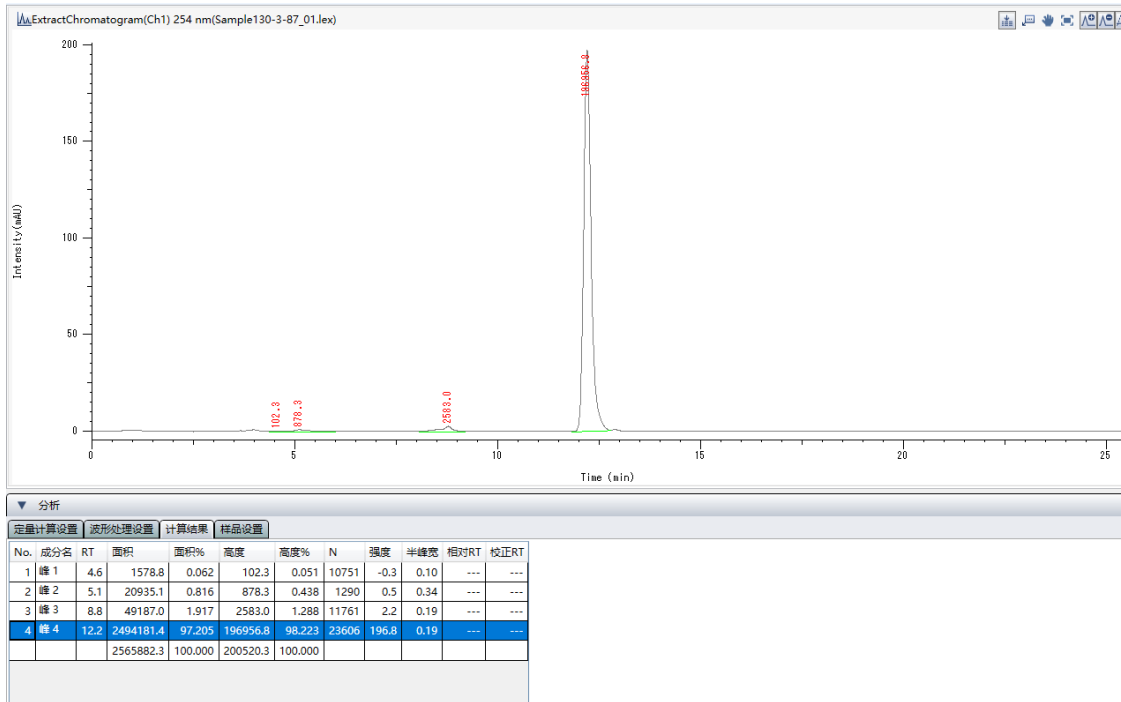

Figure S35. HPLC spectrum for compound 6.

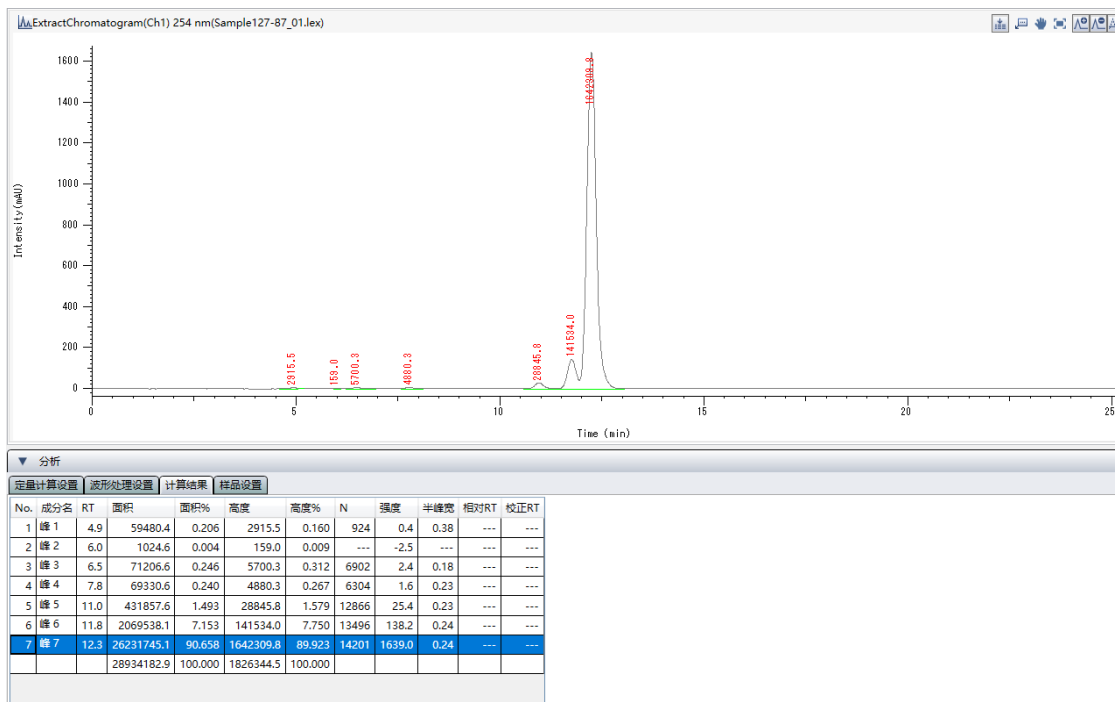

Figure S36. HPLC spectrum for compound 7.

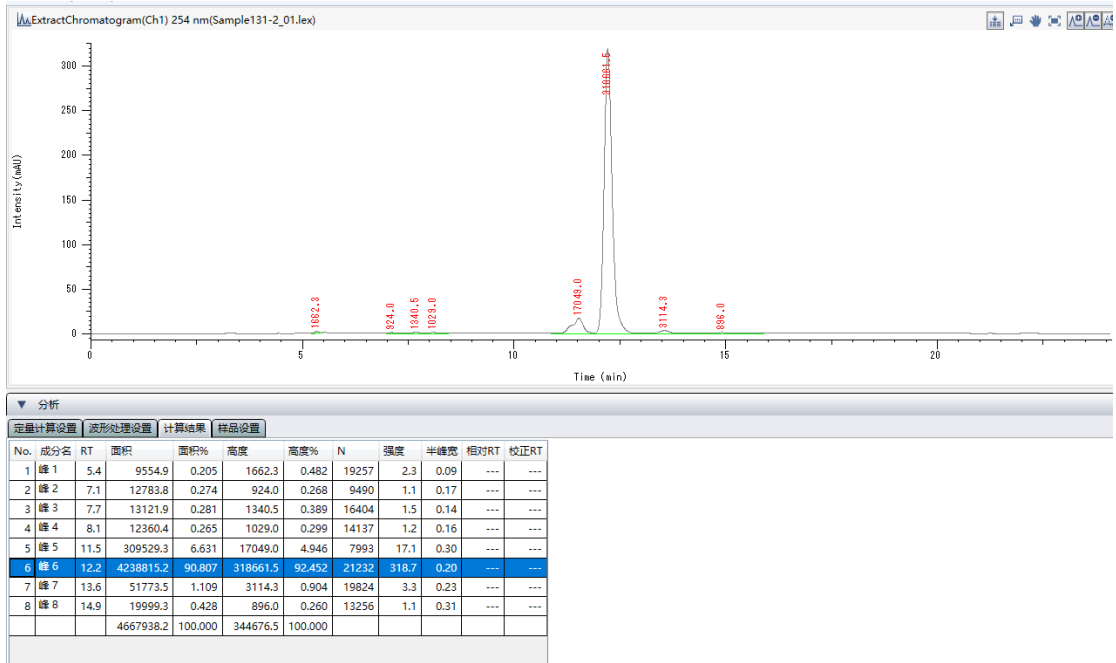

Figure S37. HPLC spectrum for compound 8.

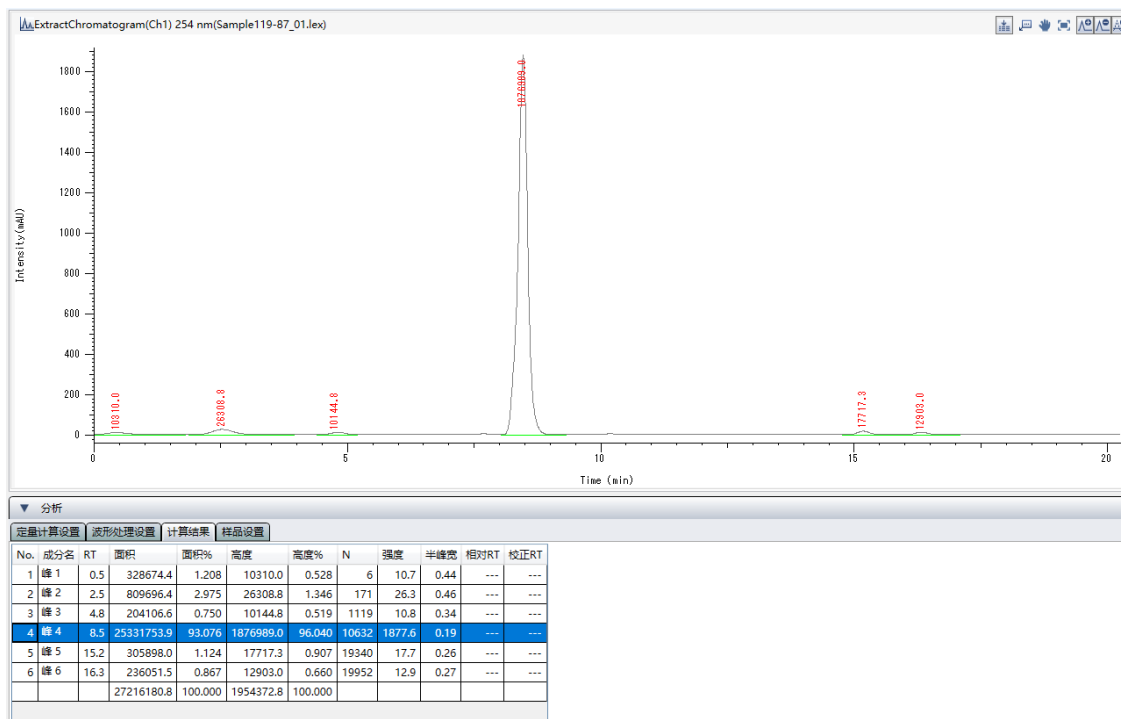

Figure S38. HPLC spectrum for compound 9.

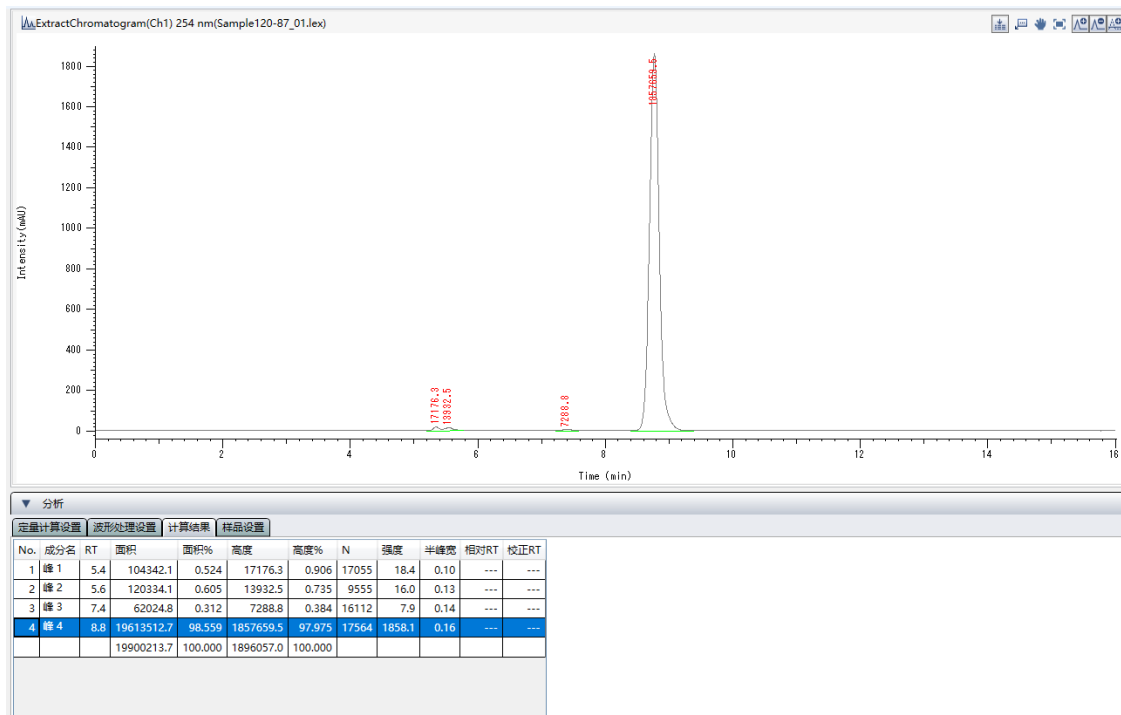

Figure S39. HPLC spectrum for compound 10.

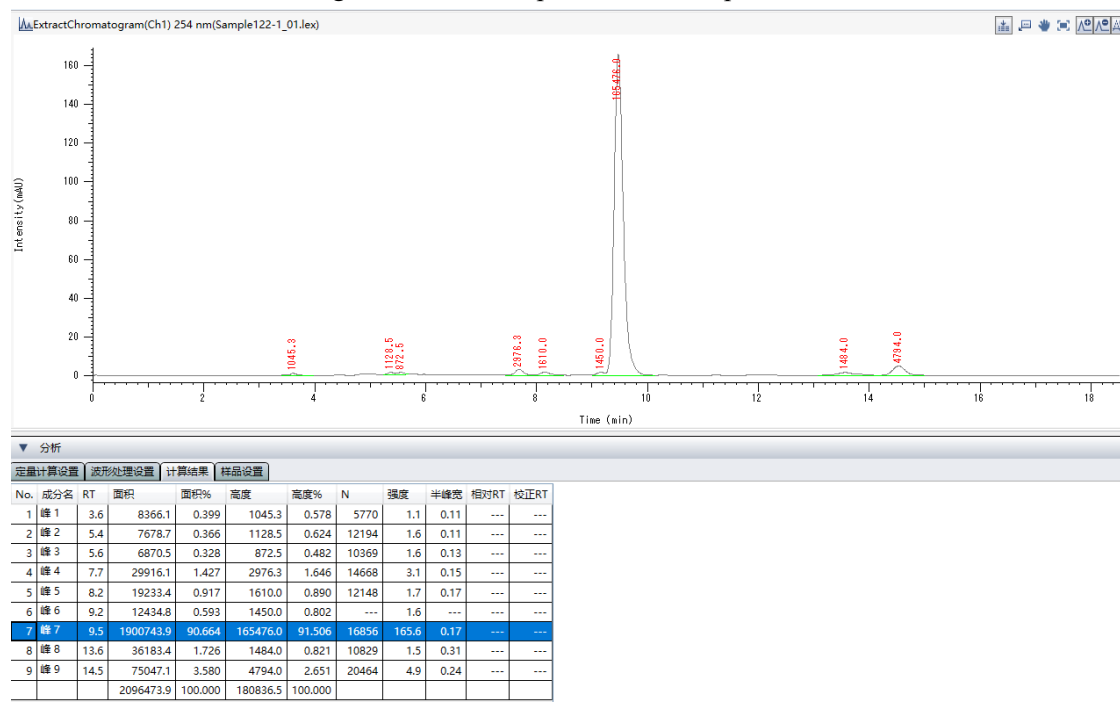

Figure S40. HPLC spectrum for compound 11.

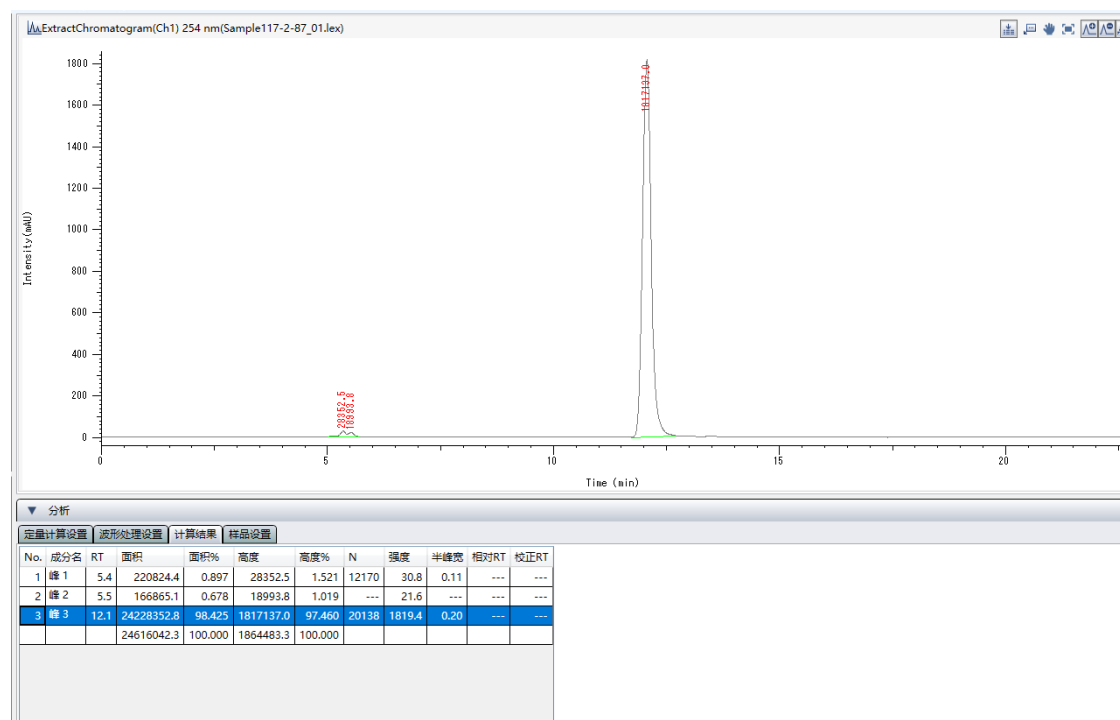

Figure S41. HPLC spectrum for compound 12.

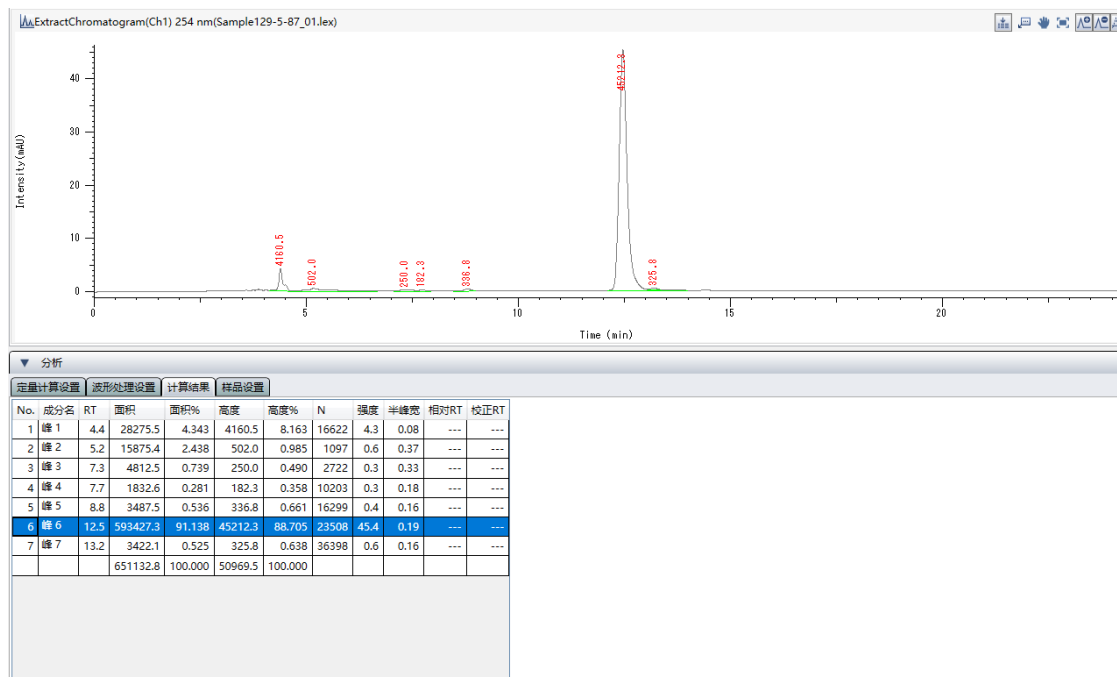

Figure S42. HPLC spectrum for compound 13.

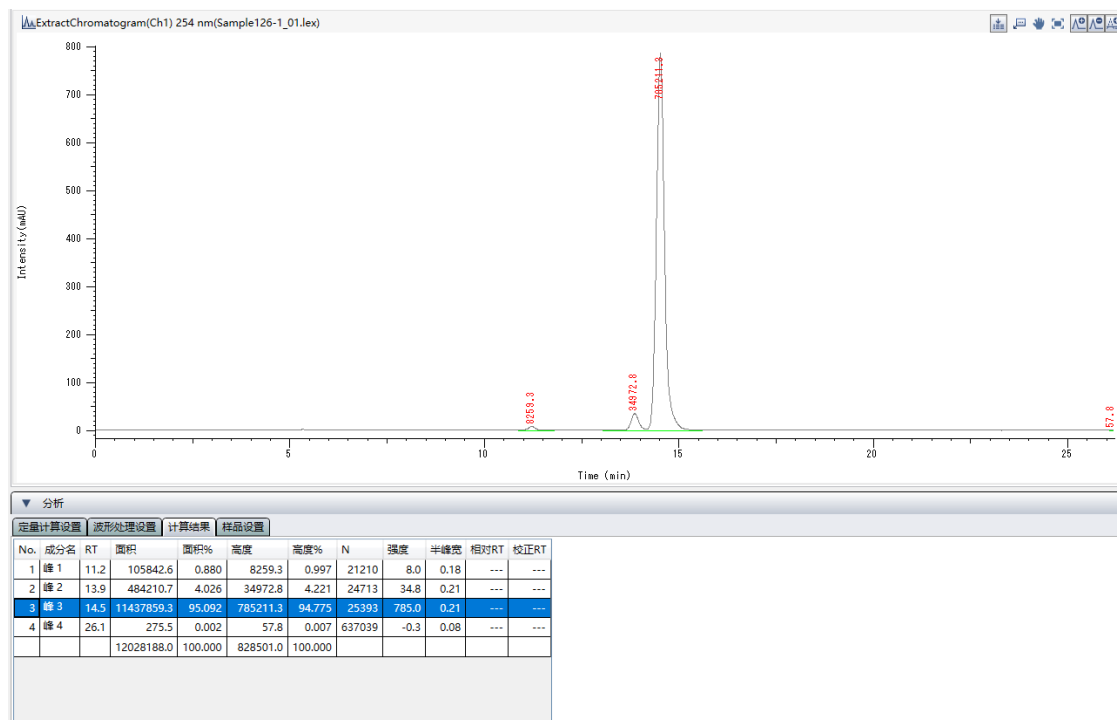

Figure S43. HPLC spectrum for compound 14.

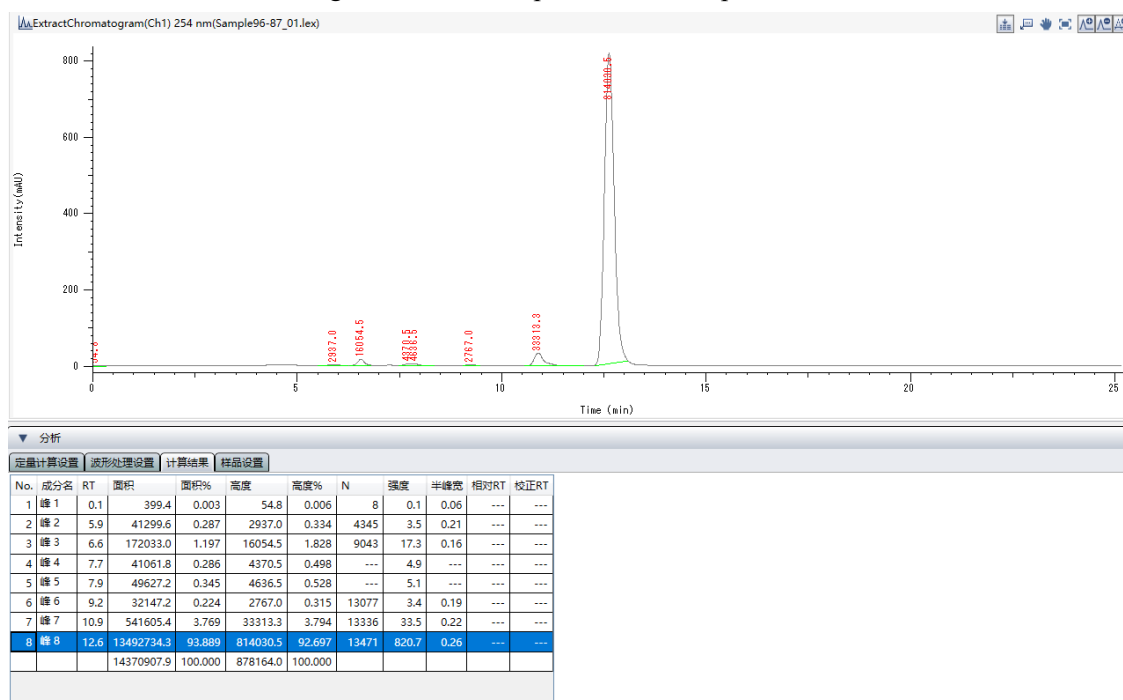

Figure S44. HPLC spectrum for compound 15.

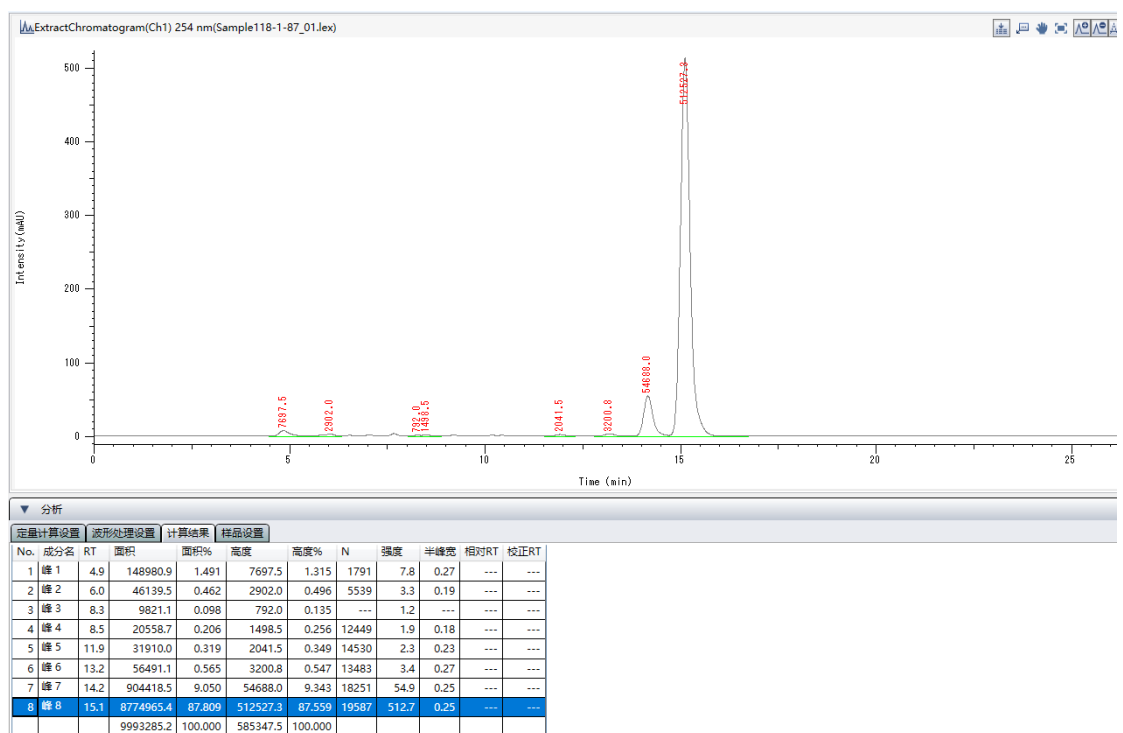

Figure S45. HPLC spectrum for compound 16.

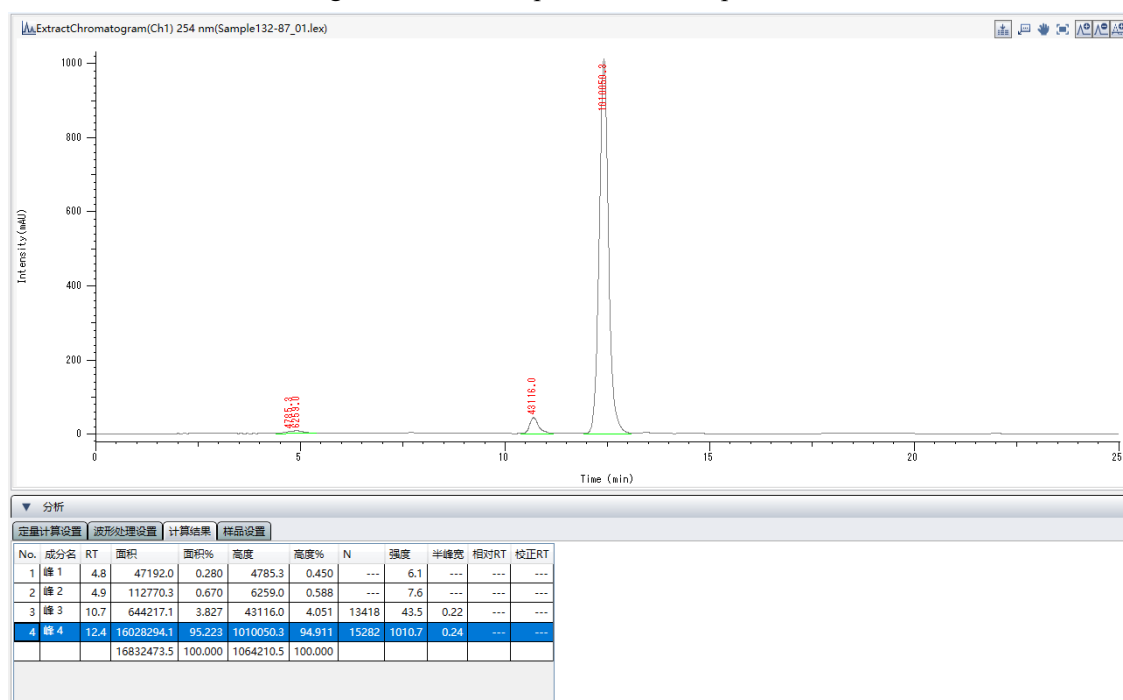

## References

1. Liao, S. R.; Du, L. J.; Qin, X. C.; Xu, L.; Wang, J. F.; Zhou, X. F.; Tu, Z. C.; Li, J.; Liu, Y. H., *Tetrahedron* **2016**, 72, (8), 1051-1057.
2. Liao, S. R.; Xu, Y.; Tang, Y.; Wang, J. F.; Zhou, X. F.; Xu, L.; Liu, Y. H., *Rsc Adv* **2015**, 5, (63), 51020-51026.
